# Supplementary material
Source: PubMed Central journal article supplement (PMC7065471)
Supplement: baADV2019001181-suppl1.pdf [file baADV2019001181-suppl1.pdf]

**Supplementary Figures and Tables:**

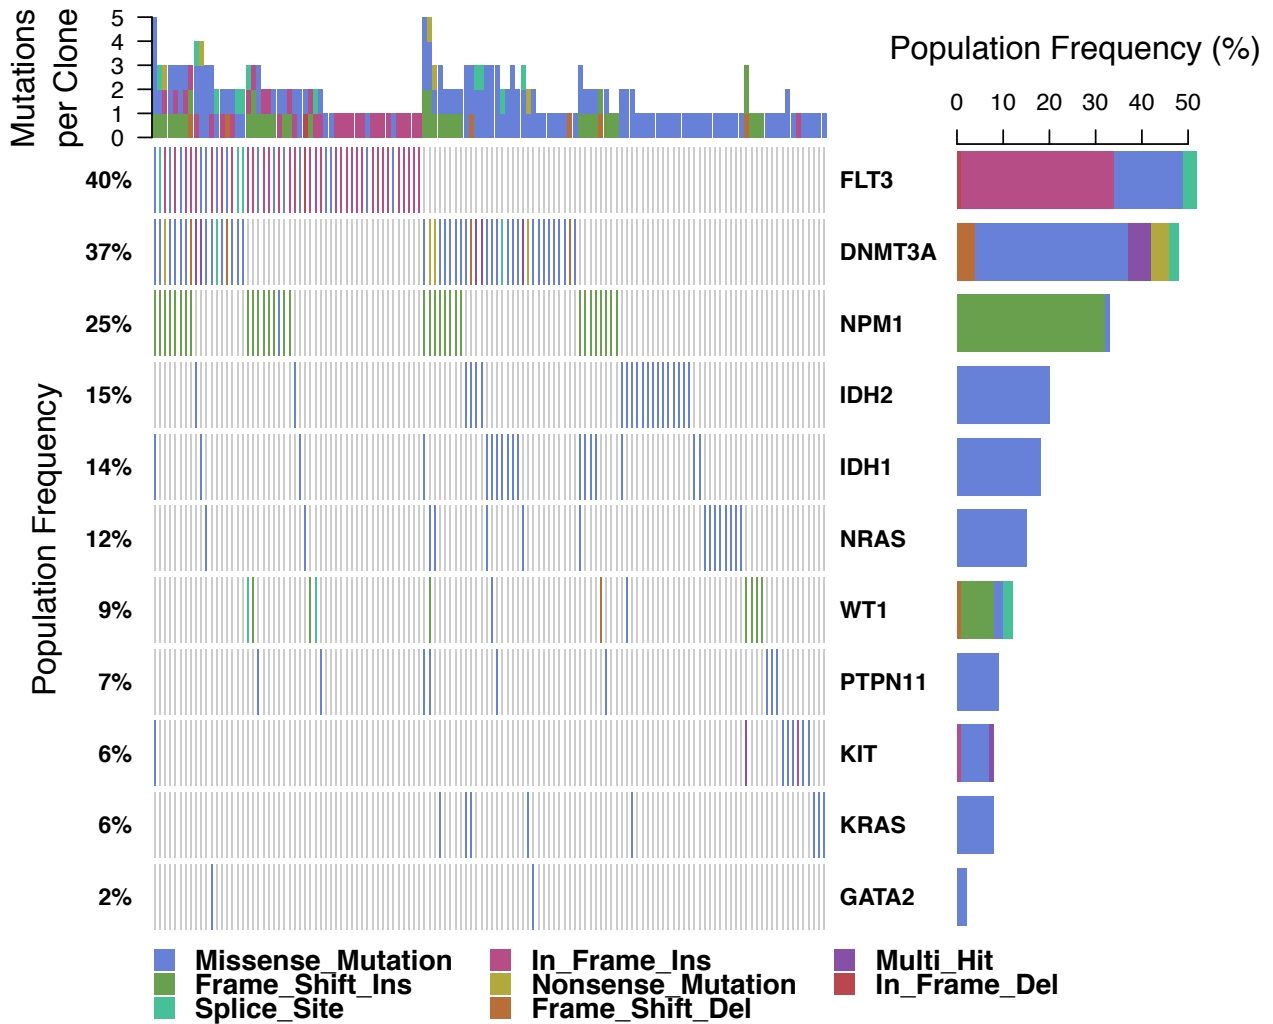

**Supplemental Figure 1: Mutation landscape of AML from the TCGA.** Somatic mutations are shown for 130 AML patients from the TCGA. Only cases with variants included in the AML single cell sequencing Tapestry mutation panel are presented.

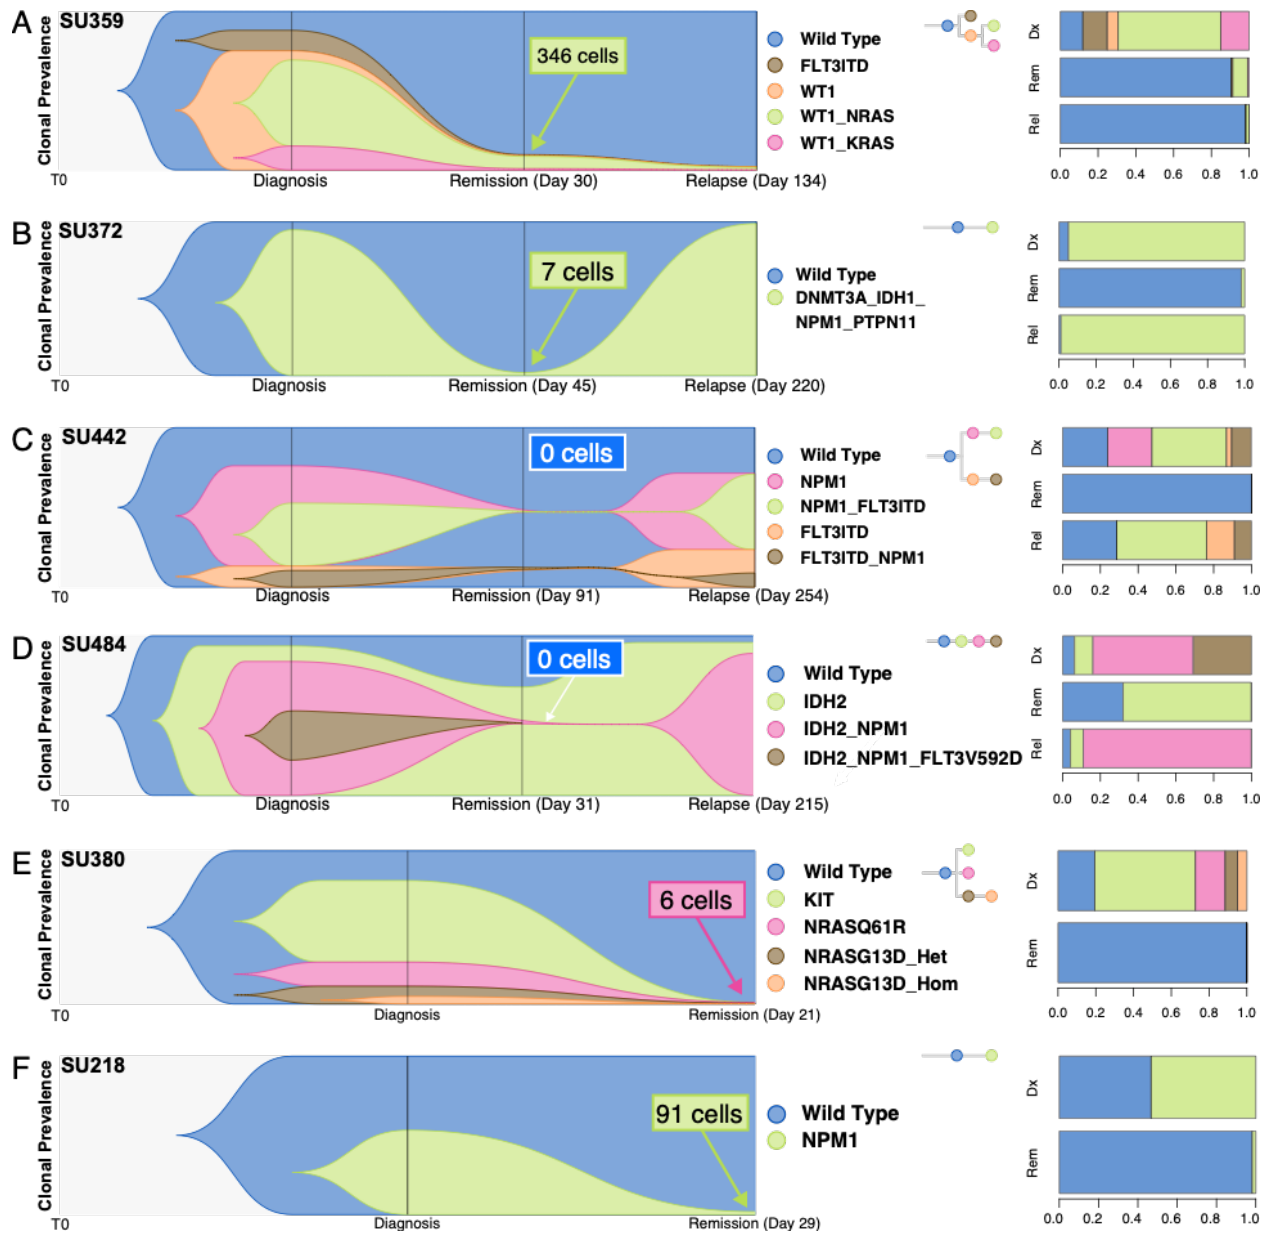

**Supplemental Figure 2: Single Cell Sequencing of AML.** Fishplots illustrating the diversity in clonal evolution for the remaining patients in our cohort. (A-D) Cases that relapsed. (E-F) Cases from patients that remained in remission. For each remission sample, the total number of cells identified as the dominant clone at relapse (or at diagnosis for SU218 and SU380) are indicated in the box. Dx – Diagnosis, Rem – Remission, Rel – Relapse.

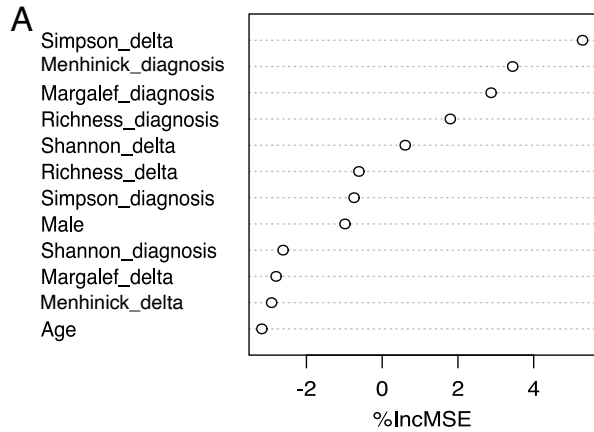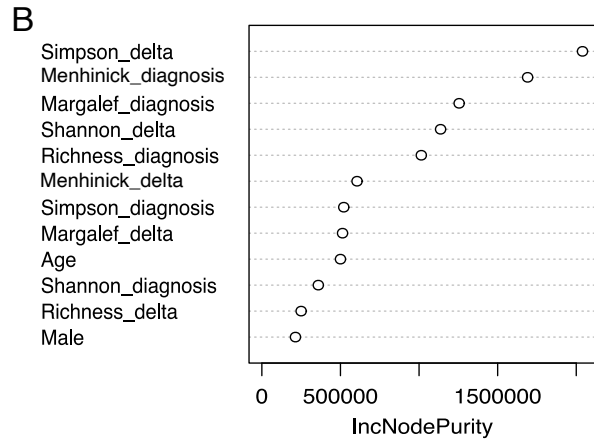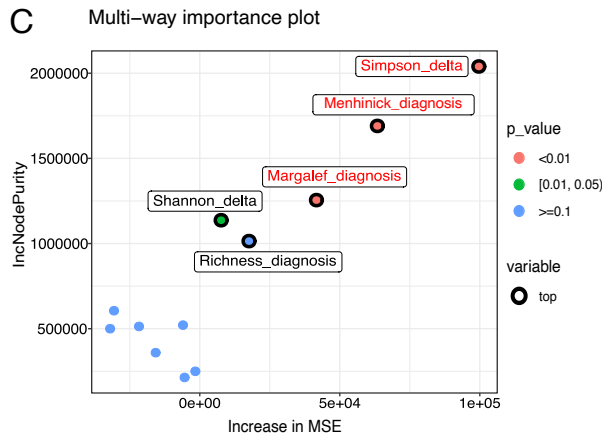

**Supplemental Figure 3: Evaluation of ecologic metrics in AML.** Assessment of variable importance using random forest regression of RFS against age, sex, and ecologic parameters. The ecologic parameters measure either clonal richness (Menhinick, Margalef, and Richness) or diversity (Shannon and Simpson) at diagnosis (diagnosis) or the change from diagnosis to remission (delta). (A-B) Variable importance was assessed by determining the increase in mean squared error (%IncMSE) after the respective variable was permuted and the decrease in residual sum of squares by splits in the respective variable (IncNodePurity). (C) Multi-way importance plot comparing IncNodePurity and increase in MSE. Variables are colored according to significance as assessed by a one-sided binomial test. The significance represents whether the observed number of nodes where the respective variable was used for splitting exceeded the theoretical number of nodes if the variable was chosen at random. The top five variables are circled.

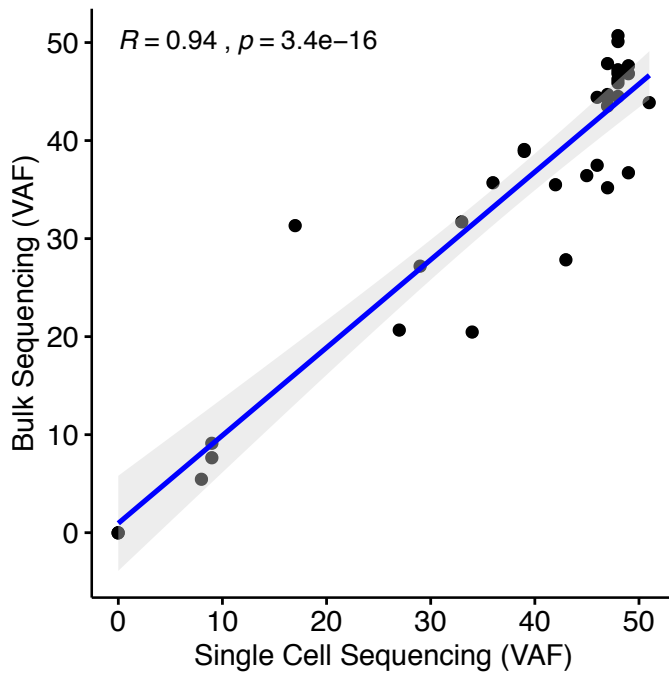

| Tapestri | Bulk Next Generation Sequencing |         |         |        |
|----------|---------------------------------|---------|---------|--------|
| ASXL1    | ASXL1                           | TET2    | MT-RNR2 | LAMA5  |
| DNMT3A   | DNMT3A                          | CEBPA   | MAU2    | ABL1   |
| EZH2     | EZH2                            | SMC1A   | MT-CO1  | ARID1A |
| FLT3     | FLT3                            | STAG2   | CSF3R   | ATM    |
| GATA2    | GATA2                           | PHF6    | KDM6A   | ATRX   |
| IDH1     | IDH1                            | SMC3    | NF1     | CCND3  |
| IDH2     | IDH2                            | MT-CYB  | SUZ12   | JAK3   |
| JAK2     | JAK2                            | MT-ND5  | IKZF1   | MLL2   |
| KIT      | KIT                             | RAD21   | SEMA3A  | MPL    |
| KRAS     | KRAS                            | ZRSR2   | EPHA3   | MYC    |
| NPM1     | NPM1                            | CBL     | EGFR    | NOTCH1 |
| NRAS     | NRAS                            | MIR142  | ETV6    | NOTCH2 |
| PTPN11   | PTPN11                          | PLCE1   | FBXO11  | PBRM1  |
| RUNX1    | RUNX1                           | SETBP1  | TET1    | PDGFRB |
| SF3B1    | SF3B1                           | BCOR    | HECW1   | PTCH1  |
| SRSF2    | SRSF2                           | MT-RNR1 | SETD2   | PTEN   |
| TP53     | TP53                            | MT-CO3  | MED12   |        |
| U2AF1    | U2AF1                           | CTCF    | HYDIN   |        |
| WT1      | WT1                             | MT-CO2  | DIS3    |        |

**Supplemental Figure 4: Correlation between variants detected by single cell sequencing and bulk NGS.** All variants detected by bulk NGS were recovered by SCS except for three cases where ASXL1 was missed. For the variants that were captured by both assays, the correlation between VAFs determined by NGS and SCS is plotted on the left. The list of mutations covered by the TapeStri panel and targeted bulk NGS is shown on the right. All hotspot locations covered by TapeStri were also included in the bulk sequencing panel (orange). NGS – next generation sequencing. SCS – single cell sequencing.

**Supplementary Table 1: Pre-filtered single cell sequencing metrics.**

| Sample ID | Sample Type | Number of cells | Number of reads | Reads per Cell | Reads per Cell per Amplicon | Panel Uniformity | ADO    |
|-----------|-------------|-----------------|-----------------|----------------|-----------------------------|------------------|--------|
| SU372     | Diagnosis   | 8,092           | 17 M            | 912            | 18                          | 94%              | 8.24%  |
| SU372B    | Remission   | 4,841           | 17 M            | 2,793          | 56                          | 96%              | 10.73% |
| SU372C    | Relapse     | 8,528           | 21 M            | 778            | 16                          | 96%              | 3.34%  |
| SU320     | Diagnosis   | 1,855           | 12 M            | 3,845          | 77                          | 96%              | 19.86% |
| SU320B    | Remission   | 6,273           | 13 M            | 1,277          | 26                          | 94%              | 12.55% |
| SU320C    | Relapse     | 9,489           | 15 M            | 1,581          | 17                          | 94%              | 9.95%  |
| SU291     | Diagnosis   | 11,243          | 20 M            | 1,292          | 26                          | 96%              | 8.34%  |
| SU291B    | Remission   | 7,852           | 24 M            | 1,880          | 38                          | 92%              | 13.32% |
| SU291F    | Relapse     | 8,123           | 18 M            | 1,335          | 27                          | 92%              | 8.26%  |
| SU484     | Diagnosis   | 4,429           | 16 M            | 2,714          | 54                          | 96%              | 6.64%  |
| SU484B    | Remission   | 4,885           | 19 M            | 2,965          | 59                          | 94%              | 6.56%  |
| SU484C    | Relapse     | 6,087           | 18 M            | 1,569          | 31                          | 94%              | 9.23%  |
| SU654     | Diagnosis   | 8,335           | 40 M            | 3,929          | 79                          | 94%              | 13.36% |
| SU654B    | Remission   | 7,840           | 40 M            | 3,898          | 78                          | 90%              | 17.33% |
| SU654C    | Relapse     | 14,335          | 37 M            | 2,065          | 41                          | 92%              | 9.56%  |
| SU359     | Diagnosis   | 8,727           | 36 M            | 3,200          | 64                          | 92%              | 15.87% |
| SU359B    | Remission 1 | 6,750           | 35 M            | 3,688          | 74                          | 92%              | 12.03% |
| SU359C    | Remission 2 | 5,274           | 34 M            | 4,967          | 99                          | 90%              | 13.29% |
| SU067     | Diagnosis   | 11,840          | 33 M            | 2,066          | 41                          | 96%              | 13.01% |
| SU067C    | Remission   | 4,136           | 29 M            | 6,200          | 124                         | 93%              | 15.26% |
| SU067D    | Relapse     | 3,955           | 31 M            | 6,184          | 124                         | 93%              | 11.49% |
| SU674     | Diagnosis   | 16,878          | 29 M            | 1,182          | 24                          | 90%              | 8.68%  |
| SU674B    | Remission   | 12,654          | 31 M            | 1,909          | 38                          | 91%              | 9.62%  |
| SU674C    | Relapse     | 11,124          | 28 M            | 1,790          | 36                          | 92%              | 15.71% |
| SU442     | Diagnosis   | 7,662           | 38 M            | 2,880          | 58                          | 94%              | 9.94%  |
| SU442C    | Remission   | 6,969           | 30 M            | 3,235          | 65                          | 92%              | 9.04%  |
| SU442E    | Relapse     | 8,311           | 34 M            | 2,610          | 52                          | 92%              | 10.67% |
| SU353     | Diagnosis   | 8,971           | 30 M            | 2,551          | 51                          | 96%              | NA     |
| SU353B    | Remission   | 6,442           | 33 M            | 3,571          | 71                          | 95%              | NA     |
| SU353C    | Relapse     | 11,998          | 36 M            | 2,537          | 51                          | 92%              | NA     |
| SU218     | Diagnosis   | 11,974          | 38 M            | 2,413          | 48                          | 93%              | NA     |

|        |           |        |      |       |     |     |        |
|--------|-----------|--------|------|-------|-----|-----|--------|
| SU218B | Remission | 6,630  | 32 M | 3,561 | 71  | 94% | NA     |
| SU290  | Diagnosis | 4,965  | 34 M | 5,268 | 105 | 93% | 16.24% |
| SU290B | Remission | 8,726  | 32 M | 2,704 | 54  | 94% | 12.69% |
| SU380  | Diagnosis | 8,930  | 34 M | 2,841 | 57  | 96% | 12.07% |
| SU380B | Remission | 6,983  | 32 M | 3,317 | 66  | 92% | 14.09% |
| SU564  | Diagnosis | 11,452 | 36 M | 2,298 | 46  | 93% | NA     |
| SU564B | Remission | 7,179  | 36 M | 3,686 | 74  | 94% | NA     |

ADO – allele dropout.

**Supplementary Table 2:**

| Sample | Time        | Blast % | Tissue | Multiplexed PCR results                                  |
|--------|-------------|---------|--------|----------------------------------------------------------|
| SU067  | Diagnosis   | 84      | PB     |                                                          |
| SU067C | Remission   |         | BM     | NPM1 PCR negative on BM                                  |
| SU067D | Relapse     | 14      | PB     |                                                          |
| SU218  | Diagnosis   | 35      | PB     |                                                          |
| SU218B | Remission   |         | PB     |                                                          |
| SU290  | Diagnosis   | 74      | PB     |                                                          |
| SU290B | Remission   |         | BM     |                                                          |
| SU291  | Diagnosis   | 35      | PB     |                                                          |
| SU291B | Remission   |         | BM     |                                                          |
| SU291F | Relapse     | 95      | PB     |                                                          |
| SU320  | Diagnosis   | 96      | BM     |                                                          |
| SU320B | Remission   |         | BM     |                                                          |
| SU320C | Relapse     | 72      | PB     |                                                          |
| SU353  | Diagnosis   | 66      | BM     |                                                          |
| SU353B | Remission   |         | PB     |                                                          |
| SU353C | Relapse     | 87      | PB     |                                                          |
| SU359  | Diagnosis   | 31      | PB     |                                                          |
| SU359B | Remission 1 |         | PB     | FLT3 PCR on PB negative for ITD                          |
| SU359C | Remission 2 |         | PB     | FLT3 PCR on BM negative for ITD                          |
| SU372  | Diagnosis   | 75      | PB     |                                                          |
| SU372B | Remission   |         | BM     | NPM1 PCR negative on BM                                  |
| SU372C | Relapse     | 31      | PB     |                                                          |
| SU380  | Diagnosis   | 73      | PB     |                                                          |
| SU380B | Remission   |         | PB     |                                                          |
| SU442  | Diagnosis   | 27      | PB     |                                                          |
| SU442C | Remission   |         | PB     | NPM1 PCR negative on BM, FLT3 PCR negative on BM for ITD |
| SU442E | Relapse     | 45      | PB     |                                                          |

|        |           |    |    |                                                                                     |
|--------|-----------|----|----|-------------------------------------------------------------------------------------|
| SU484  | Diagnosis | 86 | PB |                                                                                     |
| SU484B | Remission |    | PB | NPM1 PCR negative on BM                                                             |
| SU484C | Relapse   | 94 | PB |                                                                                     |
| SU564  | Diagnosis | 49 | PB |                                                                                     |
| SU564B | Remission |    | PB |                                                                                     |
| SU654  | Diagnosis | 97 | PB |                                                                                     |
| SU654B | Remission |    | PB |                                                                                     |
| SU654C | Relapse   | 98 | PB |                                                                                     |
| SU674  | Diagnosis | 91 | PB |                                                                                     |
| SU674B | Remission |    | BM | DNMT3A PCR positive on BM, NPM1 PCR negative on BM, FLT3 PCR negative on BM for ITD |
| SU674C | Relapse   | 87 | PB |                                                                                     |

BM – bone marrow. PB – peripheral blood. ITD – internal tandem duplication.

**Supplementary Table 3: Clonal cell counts at diagnosis, remission and relapse.**

|                         |           |                  |                  |                |
|-------------------------|-----------|------------------|------------------|----------------|
| SU291                   | Diagnosis | Remission (D26)  | Remission (D359) | Relapse (D535) |
| WT                      | 1192      | 4554             | 4855             | 110            |
| NPM1                    | 4034      | 0                | 0                | 1              |
| NPM1/IDH1/FLT3D835Y     | 0         | 0                | 0                | 2740           |
| IDH2/NPM1               | 265       | 0                | 0                | 2              |
| SU067                   | Diagnosis | Remission (D400) | Relapse (D523)   |                |
| WT                      | 227       | 3176             | 2277             |                |
| NPM1                    | 312       | 0                | 10               |                |
| NPM1/WT1                | 0         | 10               | 488              |                |
| NPM1/PTPN11             | 4892      | 0                | 0                |                |
| SU320                   | Diagnosis | Remission (D36)  | Relapse (D52)    |                |
| WT                      | 45        | 999              | 301              |                |
| IDH2                    | 22        | 1568             | 37               |                |
| IDH2/NPM1               | 103       | 0                | 66               |                |
| IDH2/NPM1/KRAS          | 91        | 0                | 960              |                |
| IDH2/NPM1/FLT3I836del   | 298       | 0                | 0                |                |
| IDH2/NPM1/FLT3D835Y     | 34        | 0                | 0                |                |
| SU353                   | Diagnosis | Remission (D36)  | Relapse (D62)    |                |
| WT                      | 450       | 3535             | 165              |                |
| NPM1                    | 41        | 1                | 0                |                |
| NPM1/FLT3ITD_Het        | 493       | 27               | 504              |                |
| NPM1/FLT3ITD_Hom        | 4050      | 82               | 7082             |                |
| SU359                   | Diagnosis | Remission (D30)  | Relapse (D134)   |                |
| WT                      | 549       | 3976             | 4747             |                |
| FLT3ITD                 | 594       | 9                | 0                |                |
| WT1                     | 266       | 29               | 6                |                |
| WT1/NRAS                | 2498      | 346              | 86               |                |
| WT1/KRAS                | 693       | 36               | 0                |                |
| SU372                   | Diagnosis | Remission (D45)  | Relapse (D22)    |                |
| WT                      | 81        | 3611             | 14               |                |
| DNMT3A/IDH1/NPM1/PTPN11 | 1506      | 7                | 1318             |                |
| SU442                   | Diagnosis | Remission (D91)  | Relapse (D254)   |                |



|                           |           |                 |                |
|---------------------------|-----------|-----------------|----------------|
| WT                        | 990       | 4623            | 856            |
| NPM1/FLT3ITD              | 1636      | 0               | 1421           |
| NPM1                      | 972       | 0               | 1              |
| FLT3ITD/NPM1              | 436       | 0               | 269            |
| FLT3ITD                   | 115       | 0               | 441            |
| SU484                     | Diagnosis | Remission (D31) | Relapse (D215) |
| WT                        | 130       | 1497            | 117            |
| IDH2                      | 200       | 3170            | 190            |
| IDH2/NPM1                 | 1092      | 0               | 2494           |
| IDH2/NPM1/FLT3V592D       | 633       | 0               | 0              |
| SU654                     | Diagnosis | Remission (D31) | Relapse (D248) |
| WT                        | 126       | 1068            | 78             |
| DNMT3A                    | 70        | 2612            | 36             |
| DNMT3A/IDH1               | 42        | 745             | 191            |
| DNMT3A/IDH1/NPM1          | 541       | 1               | 1727           |
| DNMT3A/IDH1 NPM1/NRAS     | 3361      | 10              | 2529           |
| SU674                     | Diagnosis | Remission (D27) | Relapse (D416) |
| WT                        | 139       | 4401            | 132            |
| DNMT3A                    | 132       | 2198            | 13             |
| DNMT3A/NPM1               | 1313      | 19              | 86             |
| DNMT3A/NPM1/FLT3ITD       | 1159      | 0               | 2442           |
| SU218                     | Diagnosis | Remission (D29) |                |
| WT                        | 3098      | 4888            |                |
| NPM1                      | 3529      | 91              |                |
| SU290                     | Diagnosis | Remission (D30) |                |
| WT                        | 345       | 6215            |                |
| GATA2_Het                 | 511       | 2               |                |
| FLT3ITD8286_Het           | 68        | 0               |                |
| FLT3ITD8315_Het           | 37        | 0               |                |
| GATA2_Het/NRASG12D_Het    | 627       | 0               |                |
| GATA2_Het/FLT3ITD8286_Het | 243       | 0               |                |
| GATA2Het/FLT3ITD8315_Het  | 108       | 0               |                |
| GATA2_Het/NRASG13D_Het    | 42        | 0               |                |
| GATA2_Het/NRASQ61R_Het    | 25        | 0               |                |
| GATA2_Het/KITD816H_Het    | 22        | 0               |                |
| GATA2_Het/NRASG12C_Het    | 21        | 0               |                |

|                        |           |                 |
|------------------------|-----------|-----------------|
| GATA2_Het/NRASQ61H_Het | 20        | 0               |
| GATA2_Het/KITN822K_Het | 19        | 0               |
| SU564                  | Diagnosis | Remission (D35) |
| WT                     | 2929      | 7027            |
| KIT                    | 5934      | 6               |
| SU380                  | Diagnosis | Remission (D21) |
| WT                     | 1218      | 5761            |
| KIT                    | 3335      | 0               |
| NRASQ61R               | 986       | 6               |
| NRASG13D_Het           | 413       | 1               |
| NRASG13D_Hom           | 309       | 0               |

**Supplementary Table 4: Patient classifications based on relative changes in diversity at remission compared to diagnosis.**

| Sample | Relative Diversity at Remission |
|--------|---------------------------------|
| SU067  | Higher                          |
| SU320  | Higher                          |
| SU353  | Higher                          |
| SU372  | Higher                          |
| SU484  | Higher                          |
| SU654  | Higher                          |
| SU674  | Higher                          |
| SU218  | Lower                           |
| SU290  | Lower                           |
| SU291  | Lower                           |
| SU359  | Lower                           |
| SU380  | Lower                           |
| SU442  | Lower                           |
| SU564  | Lower                           |

**Supplemental Table 5: Data table for R-script 1: ALL.MAF**

| Hugo_Symbol | Chromosome | Start_Position | End_Position | Variant_Classification | Variant_Type | Reference_Allele | Tumor_Seq_Allele2* | Tumor_Sample_Barcode | Protein_Change    | i_transcript_name |
|-------------|------------|----------------|--------------|------------------------|--------------|------------------|--------------------|----------------------|-------------------|-------------------|
| NPM1        | 5          | 170837543      | 170837544    | Frame_Shift_Ins        | INS          | C                | N                  | SU067dx_c2           | NPM1:p.W288Cfs*12 | NM_002520.6       |
| PTPN11      | 12         | 112888198      | 112888198    | Missense_Mutation      | SNP          | G                | N                  | SU067dx_c2           | PTPN11:p.A72T     | NM_002834.4       |
| NPM1        | 5          | 170837543      | 170837544    | Frame_Shift_Ins        | INS          | C                | N                  | SU067dx_c4           | NPM1:p.W288Cfs*12 | NM_002520.6       |
| NPM1        | 5          | 170837543      | 170837544    | Frame_Shift_Ins        | INS          | C                | N                  | SU067rel_c3          | NPM1:p.W288Cfs*12 | NM_002520.6       |
| WT1         | 11         | 32417946       | 32417947     | Frame_Shift_Ins        | INS          | C                | N                  | SU067rel_c3          | WT1:p.R374Lfs*8   | NM_024426.5       |

|       |    |               |               |                       |     |   |   |             |                       |                 |
|-------|----|---------------|---------------|-----------------------|-----|---|---|-------------|-----------------------|-----------------|
| NPM1  | 5  | 1708375<br>43 | 170837<br>544 | Frame_Shift_<br>Ins   | INS | C | N | SU067rel_c4 | NPM1:p.W28<br>8Cfs*12 | NM_00252<br>0.6 |
| NPM1  | 5  | 1708375<br>43 | 170837<br>544 | Frame_Shift_<br>Ins   | INS | C | N | SU067rem_c3 | NPM1:p.W28<br>8Cfs*12 | NM_00252<br>0.6 |
| WT1   | 11 | 3241794<br>6  | 324179<br>47  | Frame_Shift_<br>Ins   | INS | C | N | SU067rem_c3 | WT1:p.R374<br>Lfs*8   | NM_02442<br>6.5 |
| NPM1  | 5  | 1708375<br>46 | 170837<br>547 | Frame_Shift_<br>Ins   | INS | T | N | SU218dx_c2  | NPM1:p.W28<br>8Cfs*12 | NM_00252<br>0.6 |
| NPM1  | 5  | 1708375<br>46 | 170837<br>547 | Frame_Shift_<br>Ins   | INS | T | N | SU218rem_c2 | p.W288Cfs*1<br>2      | NM_00252<br>0.6 |
| GATA2 | 3  | 1282027<br>68 | 128202<br>768 | Missense_M<br>utation | SNP | C | N | SU290dx_c10 |                       | NM_03263<br>8.4 |
| KIT   | 4  | 5559932<br>0  | 555993<br>20  | Missense_M<br>utation | SNP | G | N | SU290dx_c10 | p.D816H               | NM_00022<br>2.2 |
| GATA2 | 3  | 1282027<br>68 | 128202<br>768 | Missense_M<br>utation | SNP | C | N | SU290dx_c11 |                       | NM_03263<br>8.4 |
| NRAS  | 1  | 1152587<br>48 | 115258<br>748 | Missense_M<br>utation | SNP | C | N | SU290dx_c11 | p.G12C                | NM_00252<br>4.5 |
| GATA2 | 3  | 1282027<br>68 | 128202<br>768 | Missense_M<br>utation | SNP | C | N | SU290dx_c12 |                       | NM_03263<br>8.4 |
| NRAS  | 1  | 1152565<br>28 | 115256<br>528 | Missense_M<br>utation | SNP | T | N | SU290dx_c12 | p.Q61H                | NM_00252<br>4.5 |
| GATA2 | 3  | 1282027<br>68 | 128202<br>768 | Missense_M<br>utation | SNP | C | N | SU290dx_c13 |                       | NM_03263<br>8.4 |
| KIT   | 4  | 5559934<br>0  | 555993<br>40  | Missense_M<br>utation | SNP | T | N | SU290dx_c13 | p.N822K               | NM_00022<br>2.2 |
| GATA2 | 3  | 1282027<br>68 | 128202<br>768 | Missense_M<br>utation | SNP | C | N | SU290dx_c2  |                       | NM_03263<br>8.4 |
| NRAS  | 1  | 1152587<br>47 | 115258<br>747 | Missense_M<br>utation | SNP | C | N | SU290dx_c2  | p.G12D                | NM_00252<br>4.5 |
| GATA2 | 3  | 1282027<br>68 | 128202<br>768 | Missense_M<br>utation | SNP | C | N | SU290dx_c3  |                       | NM_03263<br>8.4 |
| FLT3  | 13 | 2860828<br>6  | 286082<br>87  | Frame_Shift_<br>Ins   | INS | X | N | SU290dx_c4  |                       |                 |
| GATA2 | 3  | 1282027<br>68 | 128202<br>768 | Missense_M<br>utation | SNP | C | N | SU290dx_c4  |                       | NM_03263<br>8.4 |
| FLT3  | 13 | 2860831<br>5  | 286083<br>16  | Frame_Shift_<br>Ins   | INS | X | N | SU290dx_c5  |                       |                 |
| GATA2 | 3  | 1282027<br>68 | 128202<br>768 | Missense_M<br>utation | SNP | C | N | SU290dx_c5  |                       | NM_03263<br>8.4 |
| FLT3  | 13 | 2860828<br>6  | 286082<br>87  | Frame_Shift_<br>Ins   | INS | X | N | SU290dx_c6  |                       |                 |
| GATA2 | 3  | 1282027<br>68 | 128202<br>768 | Missense_M<br>utation | SNP | C | N | SU290dx_c7  |                       | NM_03263<br>8.4 |
| NRAS  | 1  | 1152587<br>44 | 115258<br>744 | Missense_M<br>utation | SNP | C | N | SU290dx_c7  | p.G13D                | NM_00252<br>4.5 |
| FLT3  | 13 | 2860831<br>5  | 286083<br>16  | Frame_Shift_<br>Ins   | INS | X | N | SU290dx_c8  |                       |                 |
| GATA2 | 3  | 1282027<br>68 | 128202<br>768 | Missense_M<br>utation | SNP | C | N | SU290dx_c9  |                       | NM_03263<br>8.4 |
| NRAS  | 1  | 1152565<br>29 | 115256<br>529 | Missense_M<br>utation | SNP | T | N | SU290dx_c9  | p.Q61R                | NM_00252<br>4.5 |
| GATA2 | 3  | 1282027<br>68 | 128202<br>768 | Missense_M<br>utation | SNP | C | N | SU290rem_c3 |                       | NM_03263<br>8.4 |
| NPM1  | 5  | 1708375<br>43 | 170837<br>544 | Frame_Shift_<br>Ins   | INS | C | N | SU291dx_c2  |                       | NM_00252<br>0.6 |
| IDH2  | 15 | 9063193<br>5  | 906319<br>35  | Missense_M<br>utation | SNP | G | N | SU291dx_c4  |                       | NM_00216<br>8.3 |
| NPM1  | 5  | 1708375<br>43 | 170837<br>544 | Frame_Shift_<br>Ins   | INS | C | N | SU291dx_c4  |                       | NM_00252<br>0.6 |
| NPM1  | 5  | 1708375<br>43 | 170837<br>544 | Frame_Shift_<br>Ins   | INS | C | N | SU291rel_c2 |                       | NM_00252<br>0.6 |
| FLT3  | 13 | 2859264<br>2  | 285926<br>42  | Missense_M<br>utation | SNP | C | N | SU291rel_c3 |                       | NM_00411<br>9.2 |
| IDH1  | 2  | 2091131<br>12 | 209113<br>112 | Missense_M<br>utation | SNP | C | N | SU291rel_c3 |                       | NM_00589<br>6.3 |
| NPM1  | 5  | 1708375<br>43 | 170837<br>544 | Frame_Shift_<br>Ins   | INS | C | N | SU291rel_c3 |                       | NM_00252<br>0.6 |
| IDH2  | 15 | 9063193<br>5  | 906319<br>35  | Missense_M<br>utation | SNP | G | N | SU291rel_c4 |                       | NM_00216<br>8.3 |
| NPM1  | 5  | 1708375<br>43 | 170837<br>544 | Frame_Shift_<br>Ins   | INS | C | N | SU291rel_c4 |                       | NM_00252<br>0.6 |
| IDH2  | 15 | 9063193<br>4  | 906319<br>34  | Missense_M<br>utation | SNP | C | N | SU320dx_c1  | IDH2:p.R140<br>Q      | NM_00216<br>8.3 |
| IDH2  | 15 | 9063193<br>4  | 906319<br>34  | Missense_M<br>utation | SNP | C | N | SU320dx_c3  | IDH2:p.R140<br>Q      | NM_00216<br>8.3 |
| KRAS  | 12 | 2539828<br>4  | 253982<br>84  | Missense_M<br>utation | SNP | C | N | SU320dx_c3  | KRAS:p.G12<br>V       | NM_03336<br>0.3 |

|      |    |               |               |                       |     |      |   |             |                       |                 |
|------|----|---------------|---------------|-----------------------|-----|------|---|-------------|-----------------------|-----------------|
| NPM1 | 5  | 1708375<br>43 | 170837<br>544 | Frame_Shift_<br>Ins   | INS | C    | N | SU320dx_c3  | NPM1:p.W28<br>8Cfs*12 | NM_00252<br>0.6 |
| FLT3 | 13 | 2859263<br>4  | 285926<br>35  | In_Frame_D<br>el      | DEL | CATG | N | SU320dx_c4  | FLT3:p.I836d<br>el    | NM_00411<br>9.2 |
| IDH2 | 15 | 9063193<br>4  | 906319<br>34  | Missense_M<br>utation | SNP | C    | N | SU320dx_c4  | IDH2:p.R140<br>Q      | NM_00216<br>8.3 |
| NPM1 | 5  | 1708375<br>43 | 170837<br>544 | Frame_Shift_<br>Ins   | INS | C    | N | SU320dx_c4  | NPM1:p.W28<br>8Cfs*12 | NM_00252<br>0.6 |
| IDH2 | 15 | 9063193<br>4  | 906319<br>34  | Missense_M<br>utation | SNP | C    | N | SU320dx_c5  | IDH2:p.R140<br>Q      | NM_00216<br>8.3 |
| NPM1 | 5  | 1708375<br>43 | 170837<br>544 | Frame_Shift_<br>Ins   | INS | C    | N | SU320dx_c5  | NPM1:p.W28<br>8Cfs*12 | NM_00252<br>0.6 |
| FLT3 | 13 | 2859264<br>2  | 285926<br>42  | Missense_M<br>utation | SNP | C    | N | SU320dx_c7  | FLT3:p.D835<br>Y      | NM_00411<br>9.2 |
| IDH2 | 15 | 9063193<br>4  | 906319<br>34  | Missense_M<br>utation | SNP | C    | N | SU320dx_c7  | IDH2:p.R140<br>Q      | NM_00216<br>8.3 |
| NPM1 | 5  | 1708375<br>43 | 170837<br>544 | Frame_Shift_<br>Ins   | INS | C    | N | SU320dx_c7  | NPM1:p.W28<br>8Cfs*12 | NM_00252<br>0.6 |
| IDH2 | 15 | 9063193<br>4  | 906319<br>34  | Missense_M<br>utation | SNP | C    | N | SU320rel_c1 | IDH2:p.R140<br>Q      | NM_00216<br>8.3 |
| IDH2 | 15 | 9063193<br>4  | 906319<br>34  | Missense_M<br>utation | SNP | C    | N | SU320rel_c3 | IDH2:p.R140<br>Q      | NM_00216<br>8.3 |
| KRAS | 12 | 2539828<br>4  | 253982<br>84  | Missense_M<br>utation | SNP | C    | N | SU320rel_c3 | KRAS:p.G12<br>V       | NM_03336<br>0.3 |
| NPM1 | 5  | 1708375<br>43 | 170837<br>544 | Frame_Shift_<br>Ins   | INS | C    | N | SU320rel_c3 | NPM1:p.W28<br>8Cfs*12 | NM_00252<br>0.6 |
| IDH2 | 15 | 9063193<br>4  | 906319<br>34  | Missense_M<br>utation | SNP | C    | N | SU320rel_c5 | IDH2:p.R140<br>Q      | NM_00216<br>8.3 |
| NPM1 | 5  | 1708375<br>43 | 170837<br>544 | Frame_Shift_<br>Ins   | INS | C    | N | SU320rel_c5 | NPM1:p.W28<br>8Cfs*12 | NM_00252<br>0.6 |
| IDH2 | 15 | 9063193<br>4  | 906319<br>34  | Missense_M<br>utation | SNP | C    | N | SU320rem_c1 | IDH2:p.R140<br>Q      | NM_00216<br>8.3 |
| FLT3 | 13 | 2860827<br>5  | 286082<br>76  | Frame_Shift_<br>Ins   | INS | X    | N | SU353dx_c1  |                       |                 |
| NPM1 | 5  | 1708375<br>43 | 170837<br>544 | Frame_Shift_<br>Ins   | INS | C    | N | SU353dx_c1  |                       | NM_00252<br>0.6 |
| FLT3 | 13 | 2860827<br>5  | 286082<br>76  | Frame_Shift_<br>Ins   | INS | X    | N | SU353dx_c3  |                       |                 |
| NPM1 | 5  | 1708375<br>43 | 170837<br>544 | Frame_Shift_<br>Ins   | INS | C    | N | SU353dx_c3  |                       | NM_00252<br>0.6 |
| NPM1 | 5  | 1708375<br>43 | 170837<br>544 | Frame_Shift_<br>Ins   | INS | C    | N | SU353dx_c4  |                       | NM_00252<br>0.6 |
| FLT3 | 13 | 2860827<br>5  | 286082<br>76  | Frame_Shift_<br>Ins   | INS | X    | N | SU353rel_c1 |                       |                 |
| NPM1 | 5  | 1708375<br>43 | 170837<br>544 | Frame_Shift_<br>Ins   | INS | C    | N | SU353rel_c1 |                       | NM_00252<br>0.6 |
| FLT3 | 13 | 2860827<br>5  | 286082<br>76  | Frame_Shift_<br>Ins   | INS | X    | N | SU353rel_c3 |                       |                 |
| NPM1 | 5  | 1708375<br>43 | 170837<br>544 | Frame_Shift_<br>Ins   | INS | C    | N | SU353rel_c3 |                       | NM_00252<br>0.6 |
| FLT3 | 13 | 2860827<br>5  | 286082<br>76  | Frame_Shift_<br>Ins   | INS | X    | N | SU353rem_c1 |                       |                 |
| NPM1 | 5  | 1708375<br>43 | 170837<br>544 | Frame_Shift_<br>Ins   | INS | C    | N | SU353rem_c1 |                       | NM_00252<br>0.6 |
| FLT3 | 13 | 2860827<br>5  | 286082<br>76  | Frame_Shift_<br>Ins   | INS | X    | N | SU353rem_c3 |                       |                 |
| NPM1 | 5  | 1708375<br>43 | 170837<br>544 | Frame_Shift_<br>Ins   | INS | C    | N | SU353rem_c3 |                       | NM_00252<br>0.6 |
| NPM1 | 5  | 1708375<br>43 | 170837<br>544 | Frame_Shift_<br>Ins   | INS | C    | N | SU353rem_c4 |                       | NM_00252<br>0.6 |
| NRAS | 1  | 1152587<br>48 | 115258<br>748 | Missense_M<br>utation | SNP | C    | N | SU359dx_c2  |                       | NM_00252<br>4.5 |
| WT1  | 11 | 3241794<br>2  | 324179<br>43  | In_Frame_In<br>s      | INS | A    | N | SU359dx_c2  |                       | NM_02442<br>6.5 |
| KRAS | 12 | 2539828<br>4  | 253982<br>84  | Missense_M<br>utation | SNP | C    | N | SU359dx_c3  |                       | NM_03336<br>0.3 |
| WT1  | 11 | 3241794<br>2  | 324179<br>43  | In_Frame_In<br>s      | INS | A    | N | SU359dx_c3  |                       | NM_02442<br>6.5 |
| FLT3 | 13 | 2860828<br>6  | 286082<br>87  | Frame_Shift_<br>Ins   | INS | X    | N | SU359dx_c4  |                       |                 |
| WT1  | 11 | 3241794<br>2  | 324179<br>43  | In_Frame_In<br>s      | INS | A    | N | SU359dx_c5  |                       | NM_02442<br>6.5 |
| NRAS | 1  | 1152587<br>48 | 115258<br>748 | Missense_M<br>utation | SNP | C    | N | SU359rel_c2 |                       | NM_00252<br>4.5 |
| WT1  | 11 | 3241794<br>2  | 324179<br>43  | Frame_Shift_<br>Ins   | INS | A    | N | SU359rel_c2 |                       | NM_02442<br>6.5 |
| WT1  | 11 | 3241794<br>2  | 324179<br>43  | Frame_Shift_<br>Ins   | INS | A    | N | SU359rel_c5 |                       | NM_02442<br>6.5 |

|            |    |               |               |                       |     |   |   |             |                       |                 |
|------------|----|---------------|---------------|-----------------------|-----|---|---|-------------|-----------------------|-----------------|
| NRAS       | 1  | 1152587<br>48 | 115258<br>748 | Missense_M<br>utation | SNP | C | N | SU359rem_c2 |                       | NM_00252<br>4.5 |
| WT1        | 11 | 3241794<br>2  | 324179<br>43  | Frame_Shift_<br>Ins   | INS | A | N | SU359rem_c2 |                       | NM_02442<br>6.5 |
| KRAS       | 12 | 2539828<br>4  | 253982<br>84  | Missense_M<br>utation | SNP | C | N | SU359rem_c3 |                       | NM_03336<br>0.3 |
| WT1        | 11 | 3241794<br>2  | 324179<br>43  | Frame_Shift_<br>Ins   | INS | A | N | SU359rem_c3 |                       | NM_02442<br>6.5 |
| FLT3       | 13 | 2860828<br>6  | 286082<br>87  | Frame_Shift_<br>Ins   | INS | X | N | SU359rem_c4 |                       |                 |
| WT1        | 11 | 3241794<br>2  | 324179<br>43  | Frame_Shift_<br>Ins   | INS | A | N | SU359rem_c5 |                       | NM_02442<br>6.5 |
| DNMT3<br>A | 2  | 2545724<br>2  | 254572<br>42  | Missense_M<br>utation | SNP | C | N | SU372dx_c2  |                       | NM_02255<br>2.4 |
| IDH1       | 2  | 2091131<br>12 | 209113<br>112 | Missense_M<br>utation | SNP | C | N | SU372dx_c2  |                       | NM_00589<br>6.3 |
| NPM1       | 5  | 1708375<br>44 | 170837<br>545 | Frame_Shift_<br>Ins   | INS | T | N | SU372dx_c2  |                       | NM_00252<br>0.6 |
| PTPN11     | 12 | 1129268<br>52 | 112926<br>852 | Missense_M<br>utation | SNP | C | N | SU372dx_c2  |                       | NM_00283<br>4.4 |
| DNMT3<br>A | 2  | 2545724<br>2  | 254572<br>42  | Missense_M<br>utation | SNP | C | N | SU372rel_c2 |                       | NM_02255<br>2.4 |
| IDH1       | 2  | 2091131<br>12 | 209113<br>112 | Missense_M<br>utation | SNP | C | N | SU372rel_c2 |                       | NM_00589<br>6.3 |
| NPM1       | 5  | 1708375<br>44 | 170837<br>545 | Frame_Shift_<br>Ins   | INS | T | N | SU372rel_c2 |                       | NM_00252<br>0.6 |
| PTPN11     | 12 | 1129268<br>52 | 112926<br>852 | Missense_M<br>utation | SNP | C | N | SU372rel_c2 |                       | NM_00283<br>4.4 |
| DNMT3<br>A | 2  | 2545724<br>2  | 254572<br>42  | Missense_M<br>utation | SNP | C | N | SU372rem_c2 |                       | NM_02255<br>2.4 |
| IDH1       | 2  | 2091131<br>12 | 209113<br>112 | Missense_M<br>utation | SNP | C | N | SU372rem_c2 |                       | NM_00589<br>6.3 |
| NPM1       | 5  | 1708375<br>44 | 170837<br>545 | Frame_Shift_<br>Ins   | INS | T | N | SU372rem_c2 |                       | NM_00252<br>0.6 |
| PTPN11     | 12 | 1129268<br>52 | 112926<br>852 | Missense_M<br>utation | SNP | C | N | SU372rem_c2 |                       | NM_00283<br>4.4 |
| KIT        | 4  | 5558976<br>7  | 555897<br>67  | Missense_M<br>utation | SNP | A | N | SU380dx_c2  | p.T417P               | NM_00022<br>2.2 |
| NRAS       | 1  | 1152565<br>29 | 115256<br>529 | Missense_M<br>utation | SNP | T | N | SU380dx_c3  | p.Q61R                | NM_00252<br>4.5 |
| NRAS       | 1  | 1152587<br>44 | 115258<br>744 | Missense_M<br>utation | SNP | C | N | SU380dx_c4  | p.G13D                | NM_00252<br>4.4 |
| NRAS       | 1  | 1152587<br>44 | 115258<br>744 | Missense_M<br>utation | SNP | C | N | SU380dx_c5  | p.G13D                | NM_00252<br>4.4 |
| NRAS       | 1  | 1152565<br>29 | 115256<br>529 | Missense_M<br>utation | SNP | T | N | SU380rem_c3 | p.Q61R                | NM_00252<br>4.5 |
| NRAS       | 1  | 1152587<br>44 | 115258<br>744 | Missense_M<br>utation | SNP | C | N | SU380rem_c4 | p.G13D                | NM_00252<br>4.4 |
| FLT3       | 13 | 2860830<br>9  | 286083<br>10  | Frame_Shift_<br>Ins   | INS | X | N | SU442dx_c2  |                       |                 |
| NPM1       | 5  | 1708375<br>43 | 170837<br>544 | Frame_Shift_<br>Ins   | INS | C | N | SU442dx_c2  |                       | NM_00252<br>0.6 |
| NPM1       | 5  | 1708375<br>43 | 170837<br>544 | Frame_Shift_<br>Ins   | INS | C | N | SU442dx_c3  |                       | NM_00252<br>0.6 |
| FLT3       | 13 | 2860830<br>9  | 286083<br>10  | Frame_Shift_<br>Ins   | INS | X | N | SU442dx_c4  |                       |                 |
| NPM1       | 5  | 1708375<br>43 | 170837<br>544 | Frame_Shift_<br>Ins   | INS | C | N | SU442dx_c4  |                       | NM_00252<br>0.6 |
| FLT3       | 13 | 2860830<br>9  | 286083<br>10  | Frame_Shift_<br>Ins   | INS | X | N | SU442dx_c5  |                       |                 |
| FLT3       | 13 | 2860830<br>9  | 286083<br>10  | Frame_Shift_<br>Ins   | INS | X | N | SU442rel_c2 |                       |                 |
| NPM1       | 5  | 1708375<br>43 | 170837<br>544 | Frame_Shift_<br>Ins   | INS | C | N | SU442rel_c2 |                       | NM_00252<br>0.6 |
| NPM1       | 5  | 1708375<br>43 | 170837<br>544 | Frame_Shift_<br>Ins   | INS | C | N | SU442rel_c3 |                       | NM_00252<br>0.6 |
| FLT3       | 13 | 2860830<br>9  | 286083<br>10  | Frame_Shift_<br>Ins   | INS | X | N | SU442rel_c4 |                       |                 |
| NPM1       | 5  | 1708375<br>43 | 170837<br>544 | Frame_Shift_<br>Ins   | INS | C | N | SU442rel_c4 |                       | NM_00252<br>0.6 |
| FLT3       | 13 | 2860830<br>9  | 286083<br>10  | Frame_Shift_<br>Ins   | INS | X | N | SU442rel_c5 |                       |                 |
| IDH2       | 15 | 9063193<br>4  | 906319<br>34  | Missense_M<br>utation | SNP | C | N | SU484dx_c1  | IDH2:p.R140<br>Q      | NM_00216<br>8.3 |
| NPM1       | 5  | 1708375<br>43 | 170837<br>544 | Frame_Shift_<br>Ins   | INS | C | N | SU484dx_c1  | NPM1:p.W28<br>8Cfs*12 | NM_00252<br>0.6 |
| IDH2       | 15 | 9063193<br>4  | 906319<br>34  | Missense_M<br>utation | SNP | C | N | SU484dx_c2  | IDH2:p.R140<br>Q      | NM_00216<br>8.3 |

|            |    |               |               |                       |     |   |   |             |                       |                 |
|------------|----|---------------|---------------|-----------------------|-----|---|---|-------------|-----------------------|-----------------|
| FLT3       | 13 | 2860828<br>1  | 286082<br>81  | Missense_M<br>utation | SNP | A | N | SU484dx_c4  | FLT3:p.V592<br>D      | NM_00411<br>9.2 |
| IDH2       | 15 | 9063193<br>4  | 906319<br>34  | Missense_M<br>utation | SNP | C | N | SU484dx_c4  | IDH2:p.R140<br>Q      | NM_00216<br>8.3 |
| NPM1       | 5  | 1708375<br>43 | 170837<br>544 | Frame_Shift_<br>Ins   | INS | C | N | SU484dx_c4  | NPM1:p.W28<br>8Cfs*12 | NM_00252<br>0.6 |
| IDH2       | 15 | 9063193<br>4  | 906319<br>34  | Missense_M<br>utation | SNP | C | N | SU484rel_c1 | IDH2:p.R140<br>Q      | NM_00216<br>8.3 |
| NPM1       | 5  | 1708375<br>43 | 170837<br>544 | Frame_Shift_<br>Ins   | INS | C | N | SU484rel_c1 | NPM1:p.W28<br>8Cfs*12 | NM_00252<br>0.6 |
| IDH2       | 15 | 9063193<br>4  | 906319<br>34  | Missense_M<br>utation | SNP | C | N | SU484rel_c2 | IDH2:p.R140<br>Q      | NM_00216<br>8.3 |
| IDH2       | 15 | 9063193<br>4  | 906319<br>34  | Missense_M<br>utation | SNP | C | N | SU484rem_c2 | p.R140Q               | NM_00216<br>8.3 |
| KIT        | 4  | 5559934<br>0  | 555993<br>40  | Missense_M<br>utation | SNP | T | N | SU564dx_c2  | p.N822K               | NM_00022<br>2.2 |
| KIT        | 4  | 5559934<br>0  | 555993<br>40  | Missense_M<br>utation | SNP | T | N | SU564rel_c2 | p.N822K               | NM_00022<br>2.2 |
| DNMT3<br>A | 2  | 2545724<br>3  | 254572<br>43  | Missense_M<br>utation | SNP | G | N | SU654dx_c2  |                       | NM_02255<br>2.4 |
| IDH1       | 2  | 2091131<br>13 | 209113<br>113 | Missense_M<br>utation | SNP | G | N | SU654dx_c2  |                       | NM_00589<br>6.3 |
| NPM1       | 5  | 1708375<br>43 | 170837<br>544 | Frame_Shift_<br>Ins   | INS | C | N | SU654dx_c2  |                       | NM_00252<br>0.6 |
| NRAS       | 1  | 1152587<br>44 | 115258<br>744 | Missense_M<br>utation | SNP | C | N | SU654dx_c2  |                       | NM_00252<br>4.4 |
| DNMT3<br>A | 2  | 2545724<br>3  | 254572<br>43  | Missense_M<br>utation | SNP | G | N | SU654dx_c3  |                       | NM_02255<br>2.4 |
| DNMT3<br>A | 2  | 2545724<br>3  | 254572<br>43  | Missense_M<br>utation | SNP | G | N | SU654dx_c4  |                       | NM_02255<br>2.4 |
| IDH1       | 2  | 2091131<br>13 | 209113<br>113 | Missense_M<br>utation | SNP | G | N | SU654dx_c4  |                       | NM_00589<br>6.3 |
| NPM1       | 5  | 1708375<br>43 | 170837<br>544 | Frame_Shift_<br>Ins   | INS | C | N | SU654dx_c4  |                       | NM_00252<br>0.6 |
| DNMT3<br>A | 2  | 2545724<br>3  | 254572<br>43  | Missense_M<br>utation | SNP | G | N | SU654dx_c5  |                       | NM_02255<br>2.4 |
| IDH1       | 2  | 2091131<br>13 | 209113<br>113 | Missense_M<br>utation | SNP | G | N | SU654dx_c5  |                       | NM_00589<br>6.3 |
| DNMT3<br>A | 2  | 2545724<br>3  | 254572<br>43  | Missense_M<br>utation | SNP | G | N | SU654rel_c2 |                       | NM_02255<br>2.4 |
| IDH1       | 2  | 2091131<br>13 | 209113<br>113 | Missense_M<br>utation | SNP | G | N | SU654rel_c2 |                       | NM_00589<br>6.3 |
| NPM1       | 5  | 1708375<br>43 | 170837<br>544 | Frame_Shift_<br>Ins   | INS | C | N | SU654rel_c2 |                       | NM_00252<br>0.6 |
| NRAS       | 1  | 1152587<br>44 | 115258<br>744 | Missense_M<br>utation | SNP | C | N | SU654rel_c2 |                       | NM_00252<br>4.4 |
| DNMT3<br>A | 2  | 2545724<br>3  | 254572<br>43  | Missense_M<br>utation | SNP | G | N | SU654rel_c3 |                       | NM_02255<br>2.4 |
| DNMT3<br>A | 2  | 2545724<br>3  | 254572<br>43  | Missense_M<br>utation | SNP | G | N | SU654rel_c4 |                       | NM_02255<br>2.4 |
| IDH1       | 2  | 2091131<br>13 | 209113<br>113 | Missense_M<br>utation | SNP | G | N | SU654rel_c4 |                       | NM_00589<br>6.3 |
| NPM1       | 5  | 1708375<br>43 | 170837<br>544 | Frame_Shift_<br>Ins   | INS | C | N | SU654rel_c4 |                       | NM_00252<br>0.6 |
| DNMT3<br>A | 2  | 2545724<br>3  | 254572<br>43  | Missense_M<br>utation | SNP | G | N | SU654rel_c5 |                       | NM_02255<br>2.4 |
| IDH1       | 2  | 2091131<br>13 | 209113<br>113 | Missense_M<br>utation | SNP | G | N | SU654rel_c5 |                       | NM_00589<br>6.3 |
| DNMT3<br>A | 2  | 2545724<br>3  | 254572<br>43  | Missense_M<br>utation | SNP | G | N | SU654rem_c2 |                       | NM_02255<br>2.4 |
| IDH1       | 2  | 2091131<br>13 | 209113<br>113 | Missense_M<br>utation | SNP | G | N | SU654rem_c2 |                       | NM_00589<br>6.3 |
| NPM1       | 5  | 1708375<br>43 | 170837<br>544 | Frame_Shift_<br>Ins   | INS | C | N | SU654rem_c2 |                       | NM_00252<br>0.6 |
| NRAS       | 1  | 1152587<br>44 | 115258<br>744 | Missense_M<br>utation | SNP | C | N | SU654rem_c2 |                       | NM_00252<br>4.4 |
| DNMT3<br>A | 2  | 2545724<br>3  | 254572<br>43  | Missense_M<br>utation | SNP | G | N | SU654rem_c3 |                       | NM_02255<br>2.4 |
| DNMT3<br>A | 2  | 2545724<br>3  | 254572<br>43  | Missense_M<br>utation | SNP | G | N | SU654rem_c4 |                       | NM_02255<br>2.4 |
| IDH1       | 2  | 2091131<br>13 | 209113<br>113 | Missense_M<br>utation | SNP | G | N | SU654rem_c4 |                       | NM_00589<br>6.3 |
| NPM1       | 5  | 1708375<br>43 | 170837<br>544 | Frame_Shift_<br>Ins   | INS | C | N | SU654rem_c4 |                       | NM_00252<br>0.6 |
| DNMT3<br>A | 2  | 2545724<br>3  | 254572<br>43  | Missense_M<br>utation | SNP | G | N | SU654rem_c5 |                       | NM_02255<br>2.4 |
| IDH1       | 2  | 2091131<br>13 | 209113<br>113 | Missense_M<br>utation | SNP | G | N | SU654rem_c5 |                       | NM_00589<br>6.3 |

|                                                  |    |               |               |                   |     |   |   |             |  |                 |
|--------------------------------------------------|----|---------------|---------------|-------------------|-----|---|---|-------------|--|-----------------|
| DNMT3 A                                          | 2  | 2545724<br>3  | 254572<br>43  | Missense_Mutation | SNP | G | N | SU674dx_c2  |  | NM_02255<br>2.4 |
| FLT3                                             | 13 | 2860828<br>1  | 286082<br>82  | Frame_Shift_Ins   | INS | X | N | SU674dx_c2  |  |                 |
| NPM1                                             | 5  | 1708375<br>43 | 170837<br>544 | Frame_Shift_Ins   | INS | C | N | SU674dx_c2  |  | NM_00252<br>0.6 |
| DNMT3 A                                          | 2  | 2545724<br>3  | 254572<br>43  | Missense_Mutation | SNP | G | N | SU674dx_c3  |  | NM_02255<br>2.4 |
| DNMT3 A                                          | 2  | 2545724<br>3  | 254572<br>43  | Missense_Mutation | SNP | G | N | SU674dx_c4  |  | NM_02255<br>2.4 |
| NPM1                                             | 5  | 1708375<br>43 | 170837<br>544 | Frame_Shift_Ins   | INS | C | N | SU674dx_c4  |  | NM_00252<br>0.6 |
| DNMT3 A                                          | 2  | 2545724<br>3  | 254572<br>43  | Missense_Mutation | SNP | G | N | SU674rel_c2 |  | NM_02255<br>2.4 |
| FLT3                                             | 13 | 2860828<br>1  | 286082<br>82  | Frame_Shift_Ins   | INS | X | N | SU674rel_c2 |  |                 |
| NPM1                                             | 5  | 1708375<br>43 | 170837<br>544 | Frame_Shift_Ins   | INS | C | N | SU674rel_c2 |  | NM_00252<br>0.6 |
| DNMT3 A                                          | 2  | 2545724<br>3  | 254572<br>43  | Missense_Mutation | SNP | G | N | SU674rel_c3 |  | NM_02255<br>2.4 |
| DNMT3 A                                          | 2  | 2545724<br>3  | 254572<br>43  | Missense_Mutation | SNP | G | N | SU674rel_c4 |  | NM_02255<br>2.4 |
| NPM1                                             | 5  | 1708375<br>43 | 170837<br>544 | Frame_Shift_Ins   | INS | C | N | SU674rel_c4 |  | NM_00252<br>0.6 |
| DNMT3 A                                          | 2  | 2545724<br>3  | 254572<br>43  | Missense_Mutation | SNP | G | N | SU674rem_c3 |  | NM_02255<br>2.4 |
| NPM1                                             | 5  | 1708375<br>43 | 170837<br>544 | Frame_Shift_Ins   | INS | C | N | SU674rem_c4 |  | NM_00252<br>0.6 |
| * Tumor sequence was removed for patient privacy |    |               |               |                   |     |   |   |             |  |                 |

**Supplemental Table 6: Data table for R-script 1: SAMPLE.MAF**

| Hugo_Symbol | Chromosome | Start_Position | End_Position | Variant_Classification | Variant_Type | Reference_Allele | Tumor_Seq_Allele2* | Protein_Change | i_transcript_name | Tumor_Sample_Barcode |
|-------------|------------|----------------|--------------|------------------------|--------------|------------------|--------------------|----------------|-------------------|----------------------|
| DNMT3 A     | 2          | 2545724<br>2   | 254572<br>42 | Missense_Mutation      | SNP          | C                | N                  |                | NM_02255<br>2.4   | SU372dx              |
| DNMT3 A     | 2          | 2545724<br>3   | 254572<br>43 | Missense_Mutation      | SNP          | G                | N                  |                | NM_02255<br>2.4   | SU654dx              |
| DNMT3 A     | 2          | 2545724<br>3   | 254572<br>43 | Missense_Mutation      | SNP          | G                | N                  |                | NM_02255<br>2.4   | SU654dx              |
| DNMT3 A     | 2          | 2545724<br>3   | 254572<br>43 | Missense_Mutation      | SNP          | G                | N                  |                | NM_02255<br>2.4   | SU654dx              |
| DNMT3 A     | 2          | 2545724<br>3   | 254572<br>43 | Missense_Mutation      | SNP          | G                | N                  |                | NM_02255<br>2.4   | SU674dx              |
| DNMT3 A     | 2          | 2545724<br>3   | 254572<br>43 | Missense_Mutation      | SNP          | G                | N                  |                | NM_02255<br>2.4   | SU674dx              |
| DNMT3 A     | 2          | 2545724<br>3   | 254572<br>43 | Missense_Mutation      | SNP          | G                | N                  |                | NM_02255<br>2.4   | SU674dx              |
| FLT3        | 13         | 2859263<br>4   | 285926<br>35 | In_Frame_Deletion      | DEL          | CATG             | N                  | FLT3:p.I836del | NM_00411<br>9.2   | SU320dx              |
| FLT3        | 13         | 2859263<br>4   | 285926<br>35 | In_Frame_Deletion      | DEL          | CATG             | N                  | FLT3:p.I836del | NM_00411<br>9.2   | SU320dx              |
| FLT3        | 13         | 2859264<br>2   | 285926<br>42 | Missense_Mutation      | SNP          | C                | N                  | FLT3:p.D835Y   | NM_00411<br>9.2   | SU320dx              |
| FLT3        | 13         | 2860828<br>1   | 286082<br>81 | Missense_Mutation      | SNP          | A                | N                  | FLT3:p.V592D   | NM_00411<br>9.2   | SU484dx              |
| FLT3        | 13         | 2860827<br>5   | 286082<br>76 | Frame_Shift_Ins        | INS          | X                | N                  |                |                   | SU353dx              |
| FLT3        | 13         | 2860827<br>5   | 286082<br>76 | Frame_Shift_Ins        | INS          | X                | N                  |                |                   | SU353dx              |
| FLT3        | 13         | 2860828<br>6   | 286082<br>87 | Frame_Shift_Ins        | INS          | X                | N                  |                |                   | SU359dx              |
| FLT3        | 13         | 2860830<br>9   | 286083<br>10 | Frame_Shift_Ins        | INS          | X                | N                  |                |                   | SU442dx              |
| FLT3        | 13         | 2860830<br>9   | 286083<br>10 | Frame_Shift_Ins        | INS          | X                | N                  |                |                   | SU442dx              |
| FLT3        | 13         | 2860830<br>9   | 286083<br>10 | Frame_Shift_Ins        | INS          | X                | N                  |                |                   | SU442dx              |
| FLT3        | 13         | 2860828<br>1   | 286082<br>82 | Frame_Shift_Ins        | INS          | X                | N                  |                |                   | SU674dx              |
| FLT3        | 13         | 2860828<br>6   | 286082<br>87 | Frame_Shift_Ins        | INS          | X                | N                  |                |                   | SU290dx              |

|       |    |           |           |                   |     |   |   |                   |             |         |
|-------|----|-----------|-----------|-------------------|-----|---|---|-------------------|-------------|---------|
| FLT3  | 13 | 28608286  | 28608287  | Frame_Shift_Ins   | INS | X | N |                   |             | SU290dx |
| FLT3  | 13 | 28608315  | 28608316  | Frame_Shift_Ins   | INS | X | N |                   |             | SU290dx |
| FLT3  | 13 | 28608315  | 28608316  | Frame_Shift_Ins   | INS | X | N |                   |             | SU290dx |
| GATA2 | 3  | 128202768 | 128202768 | Missense_Mutation | SNP | C | N |                   | NM_032638.4 | SU290dx |
| GATA2 | 3  | 128202768 | 128202768 | Missense_Mutation | SNP | C | N |                   | NM_032638.4 | SU290dx |
| GATA2 | 3  | 128202768 | 128202768 | Missense_Mutation | SNP | C | N |                   | NM_032638.4 | SU290dx |
| GATA2 | 3  | 128202768 | 128202768 | Missense_Mutation | SNP | C | N |                   | NM_032638.4 | SU290dx |
| GATA2 | 3  | 128202768 | 128202768 | Missense_Mutation | SNP | C | N |                   | NM_032638.4 | SU290dx |
| GATA2 | 3  | 128202768 | 128202768 | Missense_Mutation | SNP | C | N |                   | NM_032638.4 | SU290dx |
| GATA2 | 3  | 128202768 | 128202768 | Missense_Mutation | SNP | C | N |                   | NM_032638.4 | SU290dx |
| GATA2 | 3  | 128202768 | 128202768 | Missense_Mutation | SNP | C | N |                   | NM_032638.4 | SU290dx |
| GATA2 | 3  | 128202768 | 128202768 | Missense_Mutation | SNP | C | N |                   | NM_032638.4 | SU290dx |
| GATA2 | 3  | 128202768 | 128202768 | Missense_Mutation | SNP | C | N |                   | NM_032638.4 | SU290dx |
| IDH1  | 2  | 20911312  | 20911312  | Missense_Mutation | SNP | C | N |                   | NM_005896.3 | SU372dx |
| IDH1  | 2  | 20911313  | 20911313  | Missense_Mutation | SNP | G | N |                   | NM_005896.3 | SU654dx |
| IDH1  | 2  | 20911313  | 20911313  | Missense_Mutation | SNP | G | N |                   | NM_005896.3 | SU654dx |
| IDH1  | 2  | 20911313  | 20911313  | Missense_Mutation | SNP | G | N |                   | NM_005896.3 | SU654dx |
| IDH2  | 15 | 90631935  | 90631935  | Missense_Mutation | SNP | G | N |                   | NM_002168.3 | SU291dx |
| IDH2  | 15 | 90631934  | 90631934  | Missense_Mutation | SNP | C | N | IDH2:p.R140Q      | NM_002168.3 | SU320dx |
| IDH2  | 15 | 90631934  | 90631934  | Missense_Mutation | SNP | C | N | IDH2:p.R140Q      | NM_002168.3 | SU320dx |
| IDH2  | 15 | 90631934  | 90631934  | Missense_Mutation | SNP | C | N | IDH2:p.R140Q      | NM_002168.3 | SU320dx |
| IDH2  | 15 | 90631934  | 90631934  | Missense_Mutation | SNP | C | N | IDH2:p.R140Q      | NM_002168.3 | SU320dx |
| IDH2  | 15 | 90631934  | 90631934  | Missense_Mutation | SNP | C | N | IDH2:p.R140Q      | NM_002168.3 | SU320dx |
| IDH2  | 15 | 90631934  | 90631934  | Missense_Mutation | SNP | C | N | IDH2:p.R140Q      | NM_002168.3 | SU320dx |
| IDH2  | 15 | 90631934  | 90631934  | Missense_Mutation | SNP | C | N | IDH2:p.R140Q      | NM_002168.3 | SU484dx |
| IDH2  | 15 | 90631934  | 90631934  | Missense_Mutation | SNP | C | N | IDH2:p.R140Q      | NM_002168.3 | SU484dx |
| IDH2  | 15 | 90631934  | 90631934  | Missense_Mutation | SNP | C | N | IDH2:p.R140Q      | NM_002168.3 | SU484dx |
| KIT   | 4  | 55599320  | 55599320  | Missense_Mutation | SNP | G | N | p.D816H           | NM_000222.2 | SU290dx |
| KIT   | 4  | 55599340  | 55599340  | Missense_Mutation | SNP | T | N | p.N822K           | NM_000222.2 | SU290dx |
| KIT   | 4  | 55589767  | 55589767  | Missense_Mutation | SNP | A | N | p.T417P           | NM_000222.2 | SU380dx |
| KIT   | 4  | 55599340  | 55599340  | Missense_Mutation | SNP | T | N | p.N822K           | NM_000222.2 | SU564dx |
| KRAS  | 12 | 25398284  | 25398284  | Missense_Mutation | SNP | C | N | KRAS:p.G12V       | NM_033360.3 | SU320dx |
| KRAS  | 12 | 25398284  | 25398284  | Missense_Mutation | SNP | C | N | KRAS:p.G12V       | NM_033360.3 | SU320dx |
| KRAS  | 12 | 25398284  | 25398284  | Missense_Mutation | SNP | C | N |                   | NM_033360.3 | SU359dx |
| NPM1  | 5  | 170837543 | 170837544 | Frame_Shift_Ins   | INS | C | N | NPM1:p.W288Cfs*12 | NM_002520.6 | SU067dx |
| NPM1  | 5  | 170837543 | 170837544 | Frame_Shift_Ins   | INS | C | N | NPM1:p.W288Cfs*12 | NM_002520.6 | SU067dx |
| NPM1  | 5  | 170837543 | 170837544 | Frame_Shift_Ins   | INS | C | N | NPM1:p.W288Cfs*12 | NM_002520.6 | SU067dx |
| NPM1  | 5  | 170837543 | 170837544 | Frame_Shift_Ins   | INS | C | N |                   | NM_002520.6 | SU291dx |
| NPM1  | 5  | 170837543 | 170837544 | Frame_Shift_Ins   | INS | C | N |                   | NM_002520.6 | SU291dx |



|            |    |               |               |                       |     |   |   |                       |                 |          |
|------------|----|---------------|---------------|-----------------------|-----|---|---|-----------------------|-----------------|----------|
| NPM1       | 5  | 1708375<br>43 | 170837<br>544 | Frame_Shift_<br>Ins   | INS | C | N | NPM1:p.W28<br>8Cfs*12 | NM_00252<br>0.6 | SU320dx  |
| NPM1       | 5  | 1708375<br>43 | 170837<br>544 | Frame_Shift_<br>Ins   | INS | C | N | NPM1:p.W28<br>8Cfs*12 | NM_00252<br>0.6 | SU320dx  |
| NPM1       | 5  | 1708375<br>43 | 170837<br>544 | Frame_Shift_<br>Ins   | INS | C | N | NPM1:p.W28<br>8Cfs*12 | NM_00252<br>0.6 | SU320dx  |
| NPM1       | 5  | 1708375<br>43 | 170837<br>544 | Frame_Shift_<br>Ins   | INS | C | N | NPM1:p.W28<br>8Cfs*12 | NM_00252<br>0.6 | SU320dx  |
| NPM1       | 5  | 1708375<br>43 | 170837<br>544 | Frame_Shift_<br>Ins   | INS | C | N | NPM1:p.W28<br>8Cfs*12 | NM_00252<br>0.6 | SU320dx  |
| NPM1       | 5  | 1708375<br>43 | 170837<br>544 | Frame_Shift_<br>Ins   | INS | C | N |                       | NM_00252<br>0.6 | SU353dx  |
| NPM1       | 5  | 1708375<br>43 | 170837<br>544 | Frame_Shift_<br>Ins   | INS | C | N |                       | NM_00252<br>0.6 | SU353dx  |
| NPM1       | 5  | 1708375<br>44 | 170837<br>545 | Frame_Shift_<br>Ins   | INS | T | N |                       | NM_00252<br>0.6 | SU372dx  |
| NPM1       | 5  | 1708375<br>43 | 170837<br>544 | Frame_Shift_<br>Ins   | INS | C | N |                       | NM_00252<br>0.6 | SU442dx  |
| NPM1       | 5  | 1708375<br>43 | 170837<br>544 | Frame_Shift_<br>Ins   | INS | C | N |                       | NM_00252<br>0.6 | SU442dx  |
| NPM1       | 5  | 1708375<br>43 | 170837<br>544 | Frame_Shift_<br>Ins   | INS | C | N |                       | NM_00252<br>0.6 | SU442dx  |
| NPM1       | 5  | 1708375<br>43 | 170837<br>544 | Frame_Shift_<br>Ins   | INS | C | N | NPM1:p.W28<br>8Cfs*12 | NM_00252<br>0.6 | SU484dx  |
| NPM1       | 5  | 1708375<br>43 | 170837<br>544 | Frame_Shift_<br>Ins   | INS | C | N | NPM1:p.W28<br>8Cfs*12 | NM_00252<br>0.6 | SU484dx  |
| NPM1       | 5  | 1708375<br>43 | 170837<br>544 | Frame_Shift_<br>Ins   | INS | C | N |                       | NM_00252<br>0.6 | SU654dx  |
| NPM1       | 5  | 1708375<br>43 | 170837<br>544 | Frame_Shift_<br>Ins   | INS | C | N |                       | NM_00252<br>0.6 | SU654dx  |
| NPM1       | 5  | 1708375<br>43 | 170837<br>544 | Frame_Shift_<br>Ins   | INS | C | N |                       | NM_00252<br>0.6 | SU674dx  |
| NPM1       | 5  | 1708375<br>43 | 170837<br>544 | Frame_Shift_<br>Ins   | INS | C | N |                       | NM_00252<br>0.6 | SU674dx  |
| NPM1       | 5  | 1708375<br>46 | 170837<br>547 | Frame_Shift_<br>Ins   | INS | T | N | NPM1:p.W28<br>8Cfs*12 | NM_00252<br>0.6 | SU218dx  |
| NRAS       | 1  | 1152587<br>48 | 115258<br>748 | Missense_M<br>utation | SNP | C | N |                       | NM_00252<br>4.5 | SU359dx  |
| NRAS       | 1  | 1152587<br>44 | 115258<br>744 | Missense_M<br>utation | SNP | C | N |                       | NM_00252<br>4.4 | SU654dx  |
| NRAS       | 1  | 1152565<br>28 | 115256<br>528 | Missense_M<br>utation | SNP | T | N | p.Q61H                | NM_00252<br>4.5 | SU290dx  |
| NRAS       | 1  | 1152565<br>29 | 115256<br>529 | Missense_M<br>utation | SNP | T | N | p.Q61R                | NM_00252<br>4.5 | SU290dx  |
| NRAS       | 1  | 1152587<br>44 | 115258<br>744 | Missense_M<br>utation | SNP | C | N | p.G13D                | NM_00252<br>4.5 | SU290dx  |
| NRAS       | 1  | 1152587<br>47 | 115258<br>747 | Missense_M<br>utation | SNP | C | N | p.G12D                | NM_00252<br>4.5 | SU290dx  |
| NRAS       | 1  | 1152587<br>48 | 115258<br>748 | Missense_M<br>utation | SNP | C | N | p.G12C                | NM_00252<br>4.5 | SU290dx  |
| NRAS       | 1  | 1152565<br>29 | 115256<br>529 | Missense_M<br>utation | SNP | T | N | p.Q61R                | NM_00252<br>4.5 | SU380dx  |
| NRAS       | 1  | 1152587<br>44 | 115258<br>744 | Missense_M<br>utation | SNP | C | N | p.G13D                | NM_00252<br>4.4 | SU380dx  |
| NRAS       | 1  | 1152587<br>44 | 115258<br>744 | Missense_M<br>utation | SNP | C | N | p.G13D                | NM_00252<br>4.4 | SU380dx  |
| PTPN11     | 12 | 1128881<br>98 | 112888<br>198 | Missense_M<br>utation | SNP | G | N | PTPN11:p.A<br>72T     | NM_00283<br>4.4 | SU067dx  |
| PTPN11     | 12 | 1129268<br>52 | 112926<br>852 | Missense_M<br>utation | SNP | C | N |                       | NM_00283<br>4.4 | SU372dx  |
| WT1        | 11 | 3241794<br>2  | 324179<br>43  | In_Frame_In<br>s      | INS | A | N |                       | NM_02442<br>6.5 | SU359dx  |
| WT1        | 11 | 3241794<br>2  | 324179<br>43  | In_Frame_In<br>s      | INS | A | N |                       | NM_02442<br>6.5 | SU359dx  |
| WT1        | 11 | 3241794<br>2  | 324179<br>43  | In_Frame_In<br>s      | INS | A | N |                       | NM_02442<br>6.5 | SU359dx  |
| DNMT3<br>A | 2  | 2545724<br>2  | 254572<br>42  | Missense_M<br>utation | SNP | C | N |                       | NM_02255<br>2.4 | SU372rel |
| DNMT3<br>A | 2  | 2545724<br>3  | 254572<br>43  | Missense_M<br>utation | SNP | G | N |                       | NM_02255<br>2.4 | SU654rel |
| DNMT3<br>A | 2  | 2545724<br>3  | 254572<br>43  | Missense_M<br>utation | SNP | G | N |                       | NM_02255<br>2.4 | SU654rel |
| DNMT3<br>A | 2  | 2545724<br>3  | 254572<br>43  | Missense_M<br>utation | SNP | G | N |                       | NM_02255<br>2.4 | SU654rel |
| DNMT3<br>A | 2  | 2545724<br>3  | 254572<br>43  | Missense_M<br>utation | SNP | G | N |                       | NM_02255<br>2.4 | SU654rel |

|        |    |           |           |                   |     |   |   |                   |             |          |
|--------|----|-----------|-----------|-------------------|-----|---|---|-------------------|-------------|----------|
| DNMT3A | 2  | 2545723   | 25457243  | Missense_Mutation | SNP | G | N |                   | NM_022552.4 | SU674rel |
| DNMT3A | 2  | 2545723   | 25457243  | Missense_Mutation | SNP | G | N |                   | NM_022552.4 | SU674rel |
| DNMT3A | 2  | 2545723   | 25457243  | Missense_Mutation | SNP | G | N |                   | NM_022552.4 | SU674rel |
| FLT3   | 13 | 2859262   | 28592642  | Missense_Mutation | SNP | C | N |                   | NM_004119.2 | SU291rel |
| FLT3   | 13 | 28608275  | 28608276  | Frame_Shift_Ins   | INS | X | N |                   |             | SU353rel |
| FLT3   | 13 | 28608275  | 28608276  | Frame_Shift_Ins   | INS | X | N |                   |             | SU353rel |
| FLT3   | 13 | 28608309  | 28608310  | Frame_Shift_Ins   | INS | X | N |                   |             | SU442rel |
| FLT3   | 13 | 28608309  | 28608310  | Frame_Shift_Ins   | INS | X | N |                   |             | SU442rel |
| FLT3   | 13 | 28608309  | 28608310  | Frame_Shift_Ins   | INS | X | N |                   |             | SU442rel |
| FLT3   | 13 | 28608281  | 28608282  | Frame_Shift_Ins   | INS | X | N |                   |             | SU674rel |
| IDH1   | 2  | 20911312  | 20911312  | Missense_Mutation | SNP | C | N |                   | NM_005896.3 | SU291rel |
| IDH1   | 2  | 20911312  | 20911312  | Missense_Mutation | SNP | C | N |                   | NM_005896.3 | SU372rel |
| IDH1   | 2  | 20911313  | 20911313  | Missense_Mutation | SNP | G | N |                   | NM_005896.3 | SU654rel |
| IDH1   | 2  | 20911313  | 20911313  | Missense_Mutation | SNP | G | N |                   | NM_005896.3 | SU654rel |
| IDH1   | 2  | 20911313  | 20911313  | Missense_Mutation | SNP | G | N |                   | NM_005896.3 | SU654rel |
| IDH2   | 15 | 90631935  | 90631935  | Missense_Mutation | SNP | G | N |                   | NM_002168.3 | SU291rel |
| IDH2   | 15 | 90631934  | 90631934  | Missense_Mutation | SNP | C | N | IDH2:p.R140Q      | NM_002168.3 | SU320rel |
| IDH2   | 15 | 90631934  | 90631934  | Missense_Mutation | SNP | C | N | IDH2:p.R140Q      | NM_002168.3 | SU320rel |
| IDH2   | 15 | 90631934  | 90631934  | Missense_Mutation | SNP | C | N | IDH2:p.R140Q      | NM_002168.3 | SU320rel |
| IDH2   | 15 | 90631934  | 90631934  | Missense_Mutation | SNP | C | N | IDH2:p.R140Q      | NM_002168.3 | SU484rel |
| IDH2   | 15 | 90631934  | 90631934  | Missense_Mutation | SNP | C | N | IDH2:p.R140Q      | NM_002168.3 | SU484rel |
| KRAS   | 12 | 25398284  | 25398284  | Missense_Mutation | SNP | C | N | KRAS:p.G12V       | NM_033360.3 | SU320rel |
| NPM1   | 5  | 170837543 | 170837544 | Frame_Shift_Ins   | INS | C | N | NPM1:p.W288Cfs*12 | NM_002520.6 | SU067rel |
| NPM1   | 5  | 170837543 | 170837544 | Frame_Shift_Ins   | INS | C | N | NPM1:p.W288Cfs*12 | NM_002520.6 | SU067rel |
| NPM1   | 5  | 170837543 | 170837544 | Frame_Shift_Ins   | INS | C | N |                   | NM_002520.6 | SU291rel |
| NPM1   | 5  | 170837543 | 170837544 | Frame_Shift_Ins   | INS | C | N |                   | NM_002520.6 | SU291rel |
| NPM1   | 5  | 170837543 | 170837544 | Frame_Shift_Ins   | INS | C | N |                   | NM_002520.6 | SU291rel |
| NPM1   | 5  | 170837543 | 170837544 | Frame_Shift_Ins   | INS | C | N | NPM1:p.W288Cfs*12 | NM_002520.6 | SU320rel |
| NPM1   | 5  | 170837543 | 170837544 | Frame_Shift_Ins   | INS | C | N | NPM1:p.W288Cfs*12 | NM_002520.6 | SU320rel |
| NPM1   | 5  | 170837543 | 170837544 | Frame_Shift_Ins   | INS | C | N |                   | NM_002520.6 | SU353rel |
| NPM1   | 5  | 170837543 | 170837544 | Frame_Shift_Ins   | INS | C | N |                   | NM_002520.6 | SU353rel |
| NPM1   | 5  | 170837544 | 170837545 | Frame_Shift_Ins   | INS | T | N |                   | NM_002520.6 | SU372rel |
| NPM1   | 5  | 170837543 | 170837544 | Frame_Shift_Ins   | INS | C | N |                   | NM_002520.6 | SU442rel |
| NPM1   | 5  | 170837543 | 170837544 | Frame_Shift_Ins   | INS | C | N |                   | NM_002520.6 | SU442rel |
| NPM1   | 5  | 170837543 | 170837544 | Frame_Shift_Ins   | INS | C | N |                   | NM_002520.6 | SU442rel |
| NPM1   | 5  | 170837543 | 170837544 | Frame_Shift_Ins   | INS | C | N | NPM1:p.W288Cfs*12 | NM_002520.6 | SU484rel |
| NPM1   | 5  | 170837543 | 170837544 | Frame_Shift_Ins   | INS | C | N |                   | NM_002520.6 | SU654rel |
| NPM1   | 5  | 170837543 | 170837544 | Frame_Shift_Ins   | INS | C | N |                   | NM_002520.6 | SU654rel |
| NPM1   | 5  | 170837543 | 170837544 | Frame_Shift_Ins   | INS | C | N |                   | NM_002520.6 | SU674rel |

|            |    |               |               |                       |     |   |   |                       |                 |          |
|------------|----|---------------|---------------|-----------------------|-----|---|---|-----------------------|-----------------|----------|
| NPM1       | 5  | 1708375<br>43 | 170837<br>544 | Frame_Shift_<br>Ins   | INS | C | N |                       | NM_00252<br>0.6 | SU674rel |
| NRAS       | 1  | 1152587<br>48 | 115258<br>748 | Missense_M<br>utation | SNP | C | N |                       | NM_00252<br>4.5 | SU359rel |
| NRAS       | 1  | 1152587<br>44 | 115258<br>744 | Missense_M<br>utation | SNP | C | N |                       | NM_00252<br>4.4 | SU654rel |
| PTPN11     | 12 | 1129268<br>52 | 112926<br>852 | Missense_M<br>utation | SNP | C | N |                       | NM_00283<br>4.4 | SU372rel |
| WT1        | 11 | 3241794<br>6  | 324179<br>47  | Frame_Shift_<br>Ins   | INS | C | N | WT1:p.R374<br>Lfs*8   | NM_02442<br>6.5 | SU067rel |
| WT1        | 11 | 3241794<br>2  | 324179<br>43  | Frame_Shift_<br>Ins   | INS | A | N |                       | NM_02442<br>6.5 | SU359rel |
| WT1        | 11 | 3241794<br>2  | 324179<br>43  | Frame_Shift_<br>Ins   | INS | A | N |                       | NM_02442<br>6.5 | SU359rel |
| DNMT3<br>A | 2  | 2545724<br>2  | 254572<br>42  | Missense_M<br>utation | SNP | C | N |                       | NM_02255<br>2.4 | SU372rem |
| DNMT3<br>A | 2  | 2545724<br>3  | 254572<br>43  | Missense_M<br>utation | SNP | G | N |                       | NM_02255<br>2.4 | SU654rem |
| DNMT3<br>A | 2  | 2545724<br>3  | 254572<br>43  | Missense_M<br>utation | SNP | G | N |                       | NM_02255<br>2.4 | SU654rem |
| DNMT3<br>A | 2  | 2545724<br>3  | 254572<br>43  | Missense_M<br>utation | SNP | G | N |                       | NM_02255<br>2.4 | SU654rem |
| DNMT3<br>A | 2  | 2545724<br>3  | 254572<br>43  | Missense_M<br>utation | SNP | G | N |                       | NM_02255<br>2.4 | SU654rem |
| DNMT3<br>A | 2  | 2545724<br>3  | 254572<br>43  | Missense_M<br>utation | SNP | G | N |                       | NM_02255<br>2.4 | SU674rem |
| FLT3       | 13 | 2860827<br>5  | 286082<br>76  | Frame_Shift_<br>Ins   | INS | X | N |                       |                 | SU353rem |
| FLT3       | 13 | 2860827<br>5  | 286082<br>76  | Frame_Shift_<br>Ins   | INS | X | N |                       |                 | SU353rem |
| FLT3       | 13 | 2860828<br>6  | 286082<br>87  | Frame_Shift_<br>Ins   | INS | X | N |                       |                 | SU359rem |
| GATA2      | 3  | 1282027<br>68 | 128202<br>768 | Missense_M<br>utation | SNP | C | N |                       | NM_03263<br>8.4 | SU290rem |
| IDH1       | 2  | 2091131<br>12 | 209113<br>112 | Missense_M<br>utation | SNP | C | N |                       | NM_00589<br>6.3 | SU372rem |
| IDH1       | 2  | 2091131<br>13 | 209113<br>113 | Missense_M<br>utation | SNP | G | N |                       | NM_00589<br>6.3 | SU654rem |
| IDH1       | 2  | 2091131<br>13 | 209113<br>113 | Missense_M<br>utation | SNP | G | N |                       | NM_00589<br>6.3 | SU654rem |
| IDH1       | 2  | 2091131<br>13 | 209113<br>113 | Missense_M<br>utation | SNP | G | N |                       | NM_00589<br>6.3 | SU654rem |
| IDH2       | 15 | 9063193<br>4  | 906319<br>34  | Missense_M<br>utation | SNP | C | N | IDH2:p.R140<br>Q      | NM_00216<br>8.3 | SU320rem |
| IDH2       | 15 | 9063193<br>4  | 906319<br>34  | Missense_M<br>utation | SNP | C | N | p.R140Q               | NM_00216<br>8.3 | SU484rem |
| KIT        | 4  | 5559934<br>0  | 555993<br>40  | Missense_M<br>utation | SNP | T | N | p.N822K               | NM_00022<br>2.2 | SU564rem |
| KRAS       | 12 | 2539828<br>4  | 253982<br>84  | Missense_M<br>utation | SNP | C | N |                       | NM_03336<br>0.3 | SU359rem |
| NPM1       | 5  | 1708375<br>43 | 170837<br>544 | Frame_Shift_<br>Ins   | INS | C | N | NPM1:p.W28<br>8Cfs*12 | NM_00252<br>0.6 | SU067rem |
| NPM1       | 5  | 1708375<br>43 | 170837<br>544 | Frame_Shift_<br>Ins   | INS | C | N |                       | NM_00252<br>0.6 | SU353rem |
| NPM1       | 5  | 1708375<br>43 | 170837<br>544 | Frame_Shift_<br>Ins   | INS | C | N |                       | NM_00252<br>0.6 | SU353rem |
| NPM1       | 5  | 1708375<br>43 | 170837<br>544 | Frame_Shift_<br>Ins   | INS | C | N |                       | NM_00252<br>0.6 | SU353rem |
| NPM1       | 5  | 1708375<br>44 | 170837<br>545 | Frame_Shift_<br>Ins   | INS | T | N |                       | NM_00252<br>0.6 | SU372rem |
| NPM1       | 5  | 1708375<br>43 | 170837<br>544 | Frame_Shift_<br>Ins   | INS | C | N |                       | NM_00252<br>0.6 | SU654rem |
| NPM1       | 5  | 1708375<br>43 | 170837<br>544 | Frame_Shift_<br>Ins   | INS | C | N |                       | NM_00252<br>0.6 | SU654rem |
| NPM1       | 5  | 1708375<br>43 | 170837<br>544 | Frame_Shift_<br>Ins   | INS | C | N |                       | NM_00252<br>0.6 | SU674rem |
| NPM1       | 5  | 1708375<br>46 | 170837<br>547 | Frame_Shift_<br>Ins   | INS | T | N | p.W288Cfs*1<br>2      | NM_00252<br>0.6 | SU218rem |
| NRAS       | 1  | 1152587<br>48 | 115258<br>748 | Missense_M<br>utation | SNP | C | N |                       | NM_00252<br>4.5 | SU359rem |
| NRAS       | 1  | 1152587<br>44 | 115258<br>744 | Missense_M<br>utation | SNP | C | N |                       | NM_00252<br>4.4 | SU654rem |
| NRAS       | 1  | 1152565<br>29 | 115256<br>529 | Missense_M<br>utation | SNP | T | N | p.Q61R                | NM_00252<br>4.5 | SU380rem |
| NRAS       | 1  | 1152587<br>44 | 115258<br>744 | Missense_M<br>utation | SNP | C | N | p.G13D                | NM_00252<br>4.4 | SU380rem |
| PTPN11     | 12 | 1129268<br>52 | 112926<br>852 | Missense_M<br>utation | SNP | C | N |                       | NM_00283<br>4.4 | SU372rem |

|                                                  |    |              |              |                     |     |   |   |                     |                 |          |
|--------------------------------------------------|----|--------------|--------------|---------------------|-----|---|---|---------------------|-----------------|----------|
| WT1                                              | 11 | 3241794<br>6 | 324179<br>47 | Frame_Shift_<br>Ins | INS | C | N | WT1:p.R374<br>Lfs*8 | NM_02442<br>6.5 | SU067rem |
| WT1                                              | 11 | 3241794<br>2 | 324179<br>43 | Frame_Shift_<br>Ins | INS | A | N |                     | NM_02442<br>6.5 | SU359rem |
| WT1                                              | 11 | 3241794<br>2 | 324179<br>43 | Frame_Shift_<br>Ins | INS | A | N |                     | NM_02442<br>6.5 | SU359rem |
| WT1                                              | 11 | 3241794<br>2 | 324179<br>43 | Frame_Shift_<br>Ins | INS | A | N |                     | NM_02442<br>6.5 | SU359rem |
| * Tumor sequence was removed for patient privacy |    |              |              |                     |     |   |   |                     |                 |          |

**Supplemental Table 7: Data table for R-script 3: COX.CSV**

| Sample ID | Age | RFS  | RFS_Status | ELN2017 | Male | Margalef_delta | Margalef_diagnosis | Menhinick_delta | Menhinick_diagnosis | Relapse | Richness_delta | Richness_diagnosis | Shannon_delta | Shannon_diagnosis | Simpson_delta | Simpson_diagnosis |
|-----------|-----|------|------------|---------|------|----------------|--------------------|-----------------|---------------------|---------|----------------|--------------------|---------------|-------------------|---------------|-------------------|
| SU067     | 54  | 514  | 1          | 1       | 0    | -0.100906      | 0.34883467         | -0.0011315      | 0.05427254          | 1       | -1             | 3                  | -0.3686051    | 0.39266859        | -0.1770126    | 0.18389383        |
| SU218     | 40  | 2665 | 0          | 1       | 0    | 0.00381715     | 0.11365047         | 0.00377576      | 0.0245681           | 0       | 0              | 2                  | -0.5997762    | 0.69103078        | -0.4619997    | 0.4978851         |
| SU290     | 64  | 2552 | 0          | 2       | 1    | -1.4553851     | 1.56986653         | -0.259132       | 0.28449727          | 0       | -11            | 13                 | -1.899891     | 1.90279975        | -0.8034609    | 0.80410409        |
| SU291     | 36  | 533  | 1          | 2       | 0    | -0.2296809     | 0.34838966         | -0.0243416      | 0.05397526          | 1       | -2             | 3                  | -0.7039594    | 0.70602827        | -0.4106011    | 0.41104011        |
| SU320     | 70  | 177  | 1          | 2       | 1    | -0.6846775     | 0.93942592         | -0.2280132      | 0.28721348          | 1       | -4             | 6                  | -0.7577449    | 1.42930665        | -0.2085441    | 0.68438595        |
| SU353     | 66  | 59   | 1          | 3       | 1    | 0.01846848     | 0.46925396         | 0.01234149      | 0.07046448          | 1       | 0              | 4                  | -0.5031805    | 0.65932647        | -0.2759475    | 0.33534845        |
| SU359     | 22  | 182  | 1          | 2       | 0    | 0.00320501     | 0.59283648         | 0.0020287       | 0.08845556          | 1       | 0              | 5                  | -0.9232275    | 1.30132652        | -0.4722784    | 0.64829816        |
| SU372     | 54  | 220  | 1          | 2       | 0    | -0.0272795     | 0.27136193         | -0.0254143      | 0.07528284          | 1       | 0              | 2                  | -0.1901516    | 0.20670906        | -0.0935936    | 0.09800598        |
| SU380     | 23  | 2318 | 0          | 1       | 1    | -0.2266115     | 0.45755622         | -0.0236889      | 0.06318997          | 0       | -2             | 5                  | -1.2630526    | 1.27291142        | -0.6444134    | 0.64683795        |
| SU442     | 62  | 274  | 1          | 2       | 0    | -0.4816806     | 0.60017787         | -0.0637263      | 0.09313806          | 1       | -4             | 5                  | -1.3848714    | 1.38691265        | -0.7205894    | 0.7210218         |
| SU484     | 71  | 224  | 1          | 3       | 0    | -0.2876195     | 0.52434827         | -0.066361       | 0.11027027          | 1       | -2             | 4                  | -0.4743953    | 1.10372805        | -0.1736623    | 0.60965202        |
| SU564     | 58  | 1778 | 0          | 3       | 1    | 0.00287225     | 0.11001535         | 0.00260426      | 0.02124416          | 0       | 0              | 2                  | -0.6276331    | 0.63451452        | -0.4408178    | 0.44252255        |
| SU654     | 46  | 257  | 1          | 1       | 1    | -0.0049356     | 0.60033432         | -0.0031638      | 0.09323922          | 1       | 0              | 5                  | 0.31275669    | 0.65909891        | 0.2444546     | 0.32285843        |
| SU674     | 51  | 420  | 1          | 2       | 0    | -0.1642327     | 0.50523091         | -0.0462846      | 0.09545044          | 1       | -1             | 4                  | -0.3611117    | 1.01667598        | -0.1401364    | 0.58775733        |

**Supplemental Table 8: Mutation Order Results\***

| Start            | Stop   | Clone            | Subclone              | Success | Trials | Binom P-Val | Q-Values | IFDR        |
|------------------|--------|------------------|-----------------------|---------|--------|-------------|----------|-------------|
| GATA2            | NRAS   | GATA2            | GATA2_NRAS            | 6       | 6      | 0.015625    | 0.11     | 0.210653296 |
| DNMT3A           | NPM1   | DNMT3A           | DNMT3A_NPM1           | 6       | 6      | 0.015625    | 0.11     | 0.210653296 |
| IDH2_NPM1        | FLT3   | IDH2_NPM1        | FLT3_IDH2_NPM1        | 4       | 4      | 0.0625      | 0.25     | 0.335704901 |
| WT1              | NRAS   | WT1              | NRAS_WT1              | 3       | 3      | 0.125       | 0.25     | 0.422157974 |
| DNMT3A           | IDH1   | DNMT3A           | DNMT3A_IDH1           | 3       | 3      | 0.125       | 0.25     | 0.422157974 |
| DNMT3A_IDH1_NPM1 | KRAS   | DNMT3A_IDH1_NPM1 | DNMT3A_IDH1_KRAS_NPM1 | 3       | 3      | 0.125       | 0.25     | 0.422157974 |
| DNMT3A_IDH1      | NPM1   | DNMT3A_IDH1      | DNMT3A_IDH1_NPM1      | 3       | 3      | 0.125       | 0.25     | 0.422157974 |
| NPM1             | WT1    | NPM1             | NPM1_WT1              | 2       | 2      | 0.25        | 0.29     | 0.565318388 |
| GATA2            | KIT    | GATA2            | GATA2_KIT             | 2       | 2      | 0.25        | 0.29     | 0.565318388 |
| IDH2_NPM1        | KRAS   | IDH2_NPM1        | IDH2_KRAS_NPM1        | 2       | 2      | 0.25        | 0.29     | 0.565318388 |
| WT1              | KRAS   | WT1              | KRAS_WT1              | 2       | 2      | 0.25        | 0.29     | 0.565318388 |
| DNMT3A_NPM1      | FLT3   | DNMT3A_NPM1      | DNMT3A_FLT3_NPM1      | 2       | 2      | 0.25        | 0.29     | 0.565318388 |
| IDH2             | NPM1   | IDH2             | IDH2_NPM1             | 4       | 6      | 0.34375     | 0.34     | 0.676327969 |
| NPM1             | FLT3   | NPM1             | FLT3_NPM1             | 4       | 6      | 0.34375     | 0.34     | 0.676327969 |
| NPM1             | PTPN11 | NPM1             | NPM1_PTPN11           | 1       | 1      | 0.5         | 0.41     | 0.877771587 |
| NPM1             | IDH1   | NPM1             | IDH1_NPM1             | 1       | 1      | 0.5         | 0.41     | 0.877771587 |
| FLT3             | GATA2  | FLT3             | FLT3_GATA2            | 2       | 4      | 0.6875      | 0.51     | 1           |
| GATA2            | FLT3   | GATA2            | FLT3_GATA2            | 2       | 4      | 0.6875      | 0.51     | 1           |
| NPM1             | IDH2   | NPM1             | IDH2_NPM1             | 2       | 6      | 0.890625    | 0.59     | 1           |
| FLT3             | NPM1   | FLT3             | FLT3_NPM1             | 2       | 6      | 0.890625    | 0.59     | 1           |

\*Data was used to generate Figure 1B

## R-Script 1 (Markdown Format): Gene Landscape

```
---
title: "01gene_landscape"
output:
  pdf_document: default
---

```${r setup, include=FALSE }
knitr::opts_chunk$set(echo = TRUE)
```

# Aim: Summarize mutational landscape of SCS

Ref:
https://bioconductor.org/packages/devel/bioc/vignettes/maftools/inst/doc/maftools.html#12\_pre-compiled\_tcga\_maf\_objects

Create MAF file based on the following:
https://docs.gdc.cancer.gov/Data/File\_Formats/MAF\_Format/

# Load libraries

```${r, include=FALSE}
library(maftools)
library(tidyverse)
library(TCGAmutations)
library(RColorBrewer)
```

# Set paths to relevant folders

```${r, include=FALSE}
pathtodata = '/Path_to_data/gene_landscape/data/'
pathtowd = '/Path_to_working_directory/gene_landscape/'
```

# Step 1: Create MAF file

I created data sheet using maf format from the SNPINFO files from tapestri. I also included clinical annotation in separate file.

The different cohorts will be based on sample timing:
1) Diagnosis 2) Remission and 3) Relapse

Load MAF files

```${r}
# setwd(pathtodata)
```

```

# load maf files
all.maf = paste0(pathtodata, 'all.maf')
clin = paste0(pathtodata, 'clin.txt')

# sam refers to entire sample information.
# The clone number, "_c#" was removed from
# the sample label.
# will be used for bulk reconstructed vafs

samclin = paste0(pathtodata, 'clin_sam.txt')
sam.maf = paste0(pathtodata, 'sample.maf')

all = read.maf(maf = all.maf, clinicalData = clin)
sam = read.maf(maf = sam.maf, clinicalData = samclin)
```

```

#### Upload LAML data

```

```{r}
#path to TCGA LAML MAF file
laml.maf = system.file('extdata', 'tcga_laml.maf.gz', package = 'maftools')
#clinical information containing survival information and histology. This is optional
laml.clin = system.file('extdata', 'tcga_laml_annot.tsv', package = 'maftools')

#Get gene list from Mbio's AML panel:
genes = read.table(file = 'mbio_amlgenes.txt')
genes = as.character(genes$V1)

# Get genes detected in our clones
genes2 = unique(dx@data$Hugo_Symbol)

lamlt = read.maf(maf = laml.maf, clinicalData = laml.clin)
laml1 = subsetMaf(maf = lamlt, genes = genes, isTCGA = T, mafObj = T) # subset for genes in
Mbio panel
laml12 = subsetMaf(maf = lamlt, genes = genes2, isTCGA = T, mafObj = T) # subset for genes in
Mbio panel that were detected
```

```

#### Set palettes

```

```{r}
# set colors
pal = brewer.pal(n = 8, name = 'Set2')
col = c("#b96d37",
        "#6780d8",
        "#b2a93d",
        "#8750a6",
        "#68a04e",
        "#b74d86",
        "#45c097",
        "#ba464e")

```



```
names(col) = c('Frame_Shift_Del','Missense_Mutation', 'Nonsense_Mutation', 'Multi_Hit',
'Frame_Shift_Ins','In_Frame_Ins', 'Splice_Site', 'In_Frame_Del')
```

```
timecolors = c("#9970ab","#c2a5cf","#e7d4e8")
names(timecolors)=c("Diagnosis", "Remission", "Relapse")
time_cols = list(Time = timecolors)
```

```
respcolors = c("#fff7bc", "#8da0cb")
names(respcolors)=c("Responder", "Non-Responder" )
resp_cols = list(Response = respcolors)
```

```
deltacolors=c("#636363", "#bdbdbd")
names(deltacolors)=c("High", "Low")
delta_cols = list(Delta = deltacolors)
```
```

Create oncoplot (Figure 1A)

```
``{r}
oncoplot(maf = all, top = 11, clinicalFeatures = c('Time', 'Response', 'Delta'), colors = col,
annotationColor = c(time_cols, resp_cols, delta_cols))
```
```

## R-Script 2 (Markdown Format): Co-occurrence analysis

```
---
title: "Co-Occurrence Analysis"
output: html_document
---
```

```
``{r setup, include=FALSE hide }
knitr::opts_chunk$set(echo = TRUE)
```
```

### ## Intro

Aim: Perform Co-occurrence analysis based on DISCOVER  
Ref: <http://ccb.nki.nl/software/discover/doc/r/discover-intro.html>  
Ref: <https://cran.r-project.org/web/packages/corrplot/vignettes/corrplot-intro.html>  
Ref: <https://www.nature.com/articles/nature25795#methods>

### # Load libraries

```
``{r, include=FALSE}
library(maftools)
library(tidyverse)
library(TCGAmutations)
library(RColorBrewer)
library(discover) # mutual exclusivity test
library(corrplot) # correlation analysis
```

```

library(maftools)
library(Thermimage) # used to rotate matrices
library(pi0)
library(vioplplot)
...

# Step 1: Create mut matrix

```{r}
# maf objects were created in 01gene_landscape_BA.Rmd
lamls2 =mutCountMatrix(maf = lamls2)
scs = mutCountMatrix(maf = all)
scs = scs[order(rownames(scs)),]
samscs = mutCountMatrix(maf = sam)
samscs = samscs[order(rownames(samscs)),]

write.table(scs, file = 'scs_mutation_matrix.txt', sep = '\t')
write.table(lamls2, file = 'lamls2_mutation_matrix.txt', sep = '\t')
write.table(samscs, file = 'samall_mutation_matrix.txt', sep = '\t')

...

# Step 2: Co-occurrence analysis

Perform correlation analysis (Figures 1C-D)

```{r}

# Run on single cell sequencing results

s = cor(t(scs), method = 'spearman')
res1 <- cor.mtest(t(scs), conf.level = .95, method = 'spearman')
pAdj <- p.adjust(c(res1[[1]]), method = "fdr")
resAdj <- matrix(pAdj, ncol = dim(res1[[1]])[1])

corrplot(s, number.cex = 0.7, method = 'color', type = 'upper', diag = F, tl.col = 'black', p.mat =
resAdj, insig = "label_sig", sig.level = c(.01, .05, 0.1), pch.cex = .9, pch.col = "black", title = 'scs')
# adj pvalues fdr

# Run on bulk constructed vafs from scs
sm = cor(t(samscs), method = 'spearman')
res6 <- cor.mtest(t(samscs), conf.level = .95, method = 'spearman')
pAdj6 <- p.adjust(c(res6[[1]]), method = "fdr")
resAdj6 <- matrix(pAdj6, ncol = dim(res6[[1]])[1])

print('sam')
corrplot(sm, number.cex = 0.7, method = 'color', type = 'upper', diag = F, tl.col = 'black', p.mat =
resAdj6, insig = "label_sig", sig.level = c(.01, .05, 0.1), pch.cex = .9, pch.col = "black", title = 'sam')
# p-adj fdr

# Run on subsetted TCGA cohort

```

```

lamls2 = lamls2[order(rownames(lamls2)),]

l2 = cor(t(lamls2), method = 'spearman')
res5 = cor.mtest(t(lamls2), conf.level = 0.95, method = 'spearman')
pAdj5 = p.adjust(c(res5[[1]]), method = "fdr")
resAdj5 <- matrix(pAdj5, ncol = dim(res5[[1]])[1])

corrplot(l2, number.cex = 0.7, method = 'color', type = 'upper', diag = F, tl.col = 'black', p.mat =
resAdj5, insig = "label_sig", sig.level = c(.01, .05, .1), pch.cex = .9, pch.col = "black", title = 'laml2')
# FDR adjusted p-values

```

...

Summarizing number of co-localizing mut (Figure 1F)

```

``{r}

coloc = colSums(scs)
hist(coloc)
names(coloc)

# Remission samples : 218, 290, 380, 564

pattern = "218|290|380|564" # remission samples
rem_index = grepl(pattern, names(coloc))

coloc_rem = coloc[rem_index]
coloc_rel = coloc[!rem_index]

#quantify numbers

col_mut_rem = sum(coloc_rem > 1)/length(coloc_rem)
col_mut_rem

col_mut_rel = sum(coloc_rel > 1)/length(coloc_rel)
col_mut_rel

vioplot(coloc_rel,coloc_rem)
x = as.numeric(c(coloc_rel,coloc_rem))
g = as.factor(c(rep("rel", length(coloc_rel)), rep("rem", length(coloc_rem))))
kruskal.test(x,g) # 0.01254
wilcox.test(x~g) # 0.0127

library(RColorBrewer)
pal = brewer.pal(3, name = 'Paired')

fit = wilcox.test(x ~ g)
p = round(fit$p.value, 3)

```

```
vioplot(x ~ g, names = c('Relapsed','Remission'), col = pal)
lab = paste('Mutations per clone')
title(lab)
legend('topright', legend = c(paste('P-val:', p)))
```

```
...
```

### R-Script 3 (Markdown Format): Diversity analysis

```
---
```

```
title: "Diversity Analysis"
```

```
output: html_document
```

```
---
```

```
``{r setup, include=FALSE}
```

```
knitr::opts_chunk$set(echo = TRUE)
```

```
...
```

#### ## Intro

Aim: Run Clonal (ie species) Richness and Diversity analysis using Vegan

Ref: <http://www.flutterbys.com.au/stats/tut/tut13.2.html>

Ref: Nature Reviews Cancer volume 17, pages 605–619 (2017)

#### # Load libraries

```
``{r, include=FALSE}
```

```
library(RColorBrewer)
```

```
library(pi0)
```

```
library(vioplot)
```

```
library(vegan)
```

```
library(survival)
```

```
library(survminer)
```

```
library(tidyverse)
```

```
library(coxphf)
```

```
library(plyr)
```

```
...
```

```
#####
```

```
## DATA PROCESSING
```

```
#####
```

Upload and reformat data

Set Paths to Folders

```
``{r}
```

```
datapath = '/Path_to_data/phylo_diversity_analysis/data'
```

```
wdpath = '/Path_to_working_directory/phylo_diversity_analysis'
```

```
...
```

```

# Diversity Analysis

``{r}
#Upload
setwd(datapath)
# cellcounts.csv contains cell counts for each clone in each sample using supplemental table 3.
cellcounts = read.csv(file = 'cellcounts.csv', header = T)
rownames(cellcounts) <- cellcounts$SampleID

...

#####
# Step 1: calculate richness
#####

``{r}

data = cellcounts[,-2] # remove column relapse designation

rich=ddply(data, ~SampleID, function(x) {
  data.frame(richness=sum(x[-1]>0))
})

# step 1a: normalize richness score for number of individuals (as richness can increase if you
sample more individuals)

n = apply(data[,-1]>0,1,sum)
N = apply(data[,-1],1,sum)

# Menhinick's index
men = function(x) {
  sum(x>0)/sqrt(sum(x))
}

rich_men = ddply(cellcounts, ~SampleID, function(x){
  data.frame(Menhinick=men(x[-1]))
})

# Margalef's Index

marg = function(x) {
  (sum(x>0)-1)/log(sum(x))
}

rich_marg = ddply(cellcounts, ~SampleID, function(x){
  data.frame(Margalef = marg(x[-1]))
})

# Combine All Richness Indices

```

```
richness = cbind(rich, Menhinick=rich_men[,2], Margalef=rich_marg[,2])
richness
```

```
plot(richness$richness, richness$Menhinick)
fit=lm(richness$richness~richness$Menhinick)
summary(fit)
```

```
plot(richness$richness, richness$Margalef)
fit=lm(richness$richness~richness$Margalef)
summary(fit)
```

```
...
```

Richness and Menchinick index are less correlated, so will use those two

```
#####
# Step 2: Calculate Diversity
#####
```

Diversity takes into account species richness and evenness

```
``{r}
```

```
shan = ddply(cellcounts, ~SampleID, function(x) {
  data.frame(Shannon = diversity(x[-1], index = 'shannon'))
})
```

```
simp = ddply(cellcounts, ~SampleID, function(x) {
  data.frame(Simpson = diversity(x[-1], index = 'simpson'))
})
```

```
diversity = cbind(shan, Simpson = simp$Simpson)
```

```
biodiversity = cbind(richness, diversity[,2:3], Relapse = cellcounts$Relapse)
rownames(biodiversity) = biodiversity[,1]
```

```
# write.csv(biodiversity, file = 'biodiversity.csv')
```

```
...
```

Subset Biodiversity data into Dx and Delta values

```
``{r, include=FALSE}
setwd(datapath)
```

```
# Get dx samples
# identify cells with '.' which indicates non dx sample.
# for example; a dx sample would be SU654 and a rem or
# relapse sample would be labeled SU654.B
```

```

rel_index = grepl(pattern = '[.]',rownames(biodiversity))
biod_dx = biodiversity[-rel_index==FALSE,]
biod_dx = biod_dx[,-1]

# Deltas were calculated in excel using the above export:
# 'biodiversity_dx.csv'
# Now we will subset for the dx samples which contains
# delta: remission - diagnosis

biod_delta = read.csv(file = 'biodiversity_delta.csv', header = T, row.names = 1)
...

#Upload data for cox multivariate regression

``{r, include=FALSE}
setwd(datapath)
# cox file has both biodiversity metrics (dx and delta)
surv = read.csv(file = 'cox.csv', header = T, row.names = 1)
...

## Create Plots

``{r}

pal = brewer.pal(3, name = 'Paired')

setwd(wdpath)

# Comparing Richness/Diversity at Dx

#Plot all Dx parameters
names = names(biod_dx[1:6])

for (i in 1:length(names)){
  lab1 = paste(names[i])
  fit = wilcox.test(biod_dx[,i] ~ Relapse, data = biod_dx)
  p = round(fit$p.value, 3)
  #svg(file = paste0(lab1,'_dx.svg'))#, width = 569, height = 646)
  boxplot(biod_dx[,i] ~ Relapse, data = biod_dx, names = c('Remission','Relapsed'), col = pal)
  title(paste(lab1,'Index at Diagnosis'))
  legend('topleft', legend = c(paste('P-val:', p)))
  #dev.off()
}
...

```

```
# Comparing Change in Richness/Diversity
```

```
``{r}
names = names(biod_delta[1:6])

for (i in 1:length(names[])){
  lab1 = paste(names[i])
  fit = wilcox.test(biod_delta[,i] ~ Relapse, data = biod_delta)
  p = round(fit$p.value, 3)
  #svg(filename = paste0(lab1, '_delta.svg'), width = 569, height = 646)
  boxplot(biod_delta[,i] ~ Relapse, data = biod_delta, names = c('Remission','Relapsed'), col =
pal)
  lab = paste('Change in', lab1, 'Index at Remission')
  title(lab)
  legend('topleft', legend = c(paste('P-val:', p)))
  #dev.off()
}
...

```

```
#####
# Step 3: Coxph multi-variate
#####

```

```
``{r}
# Fit survival data using KM method; survival here will be RFS
surv_object = Surv(time = surv$RFS, event = surv$RFS_Status)

# Create categorial variables:
surv <- surv %>% mutate('Menhinick_Level' = ifelse(Menhinick_diagnosis >
median(surv$Menhinick_diagnosis), "High", "Low"))
surv$Menhinick_Level <- factor(surv$Menhinick_Level)

surv <- surv %>% mutate('Simpson_Delta_Level' = ifelse(Simpson_delta >
median(surv$Simpson_delta), "High", "Low"))
surv$Simpson_Delta_Level <- factor(surv$Simpson_Delta_Level)

surv = surv %>% mutate(Simpson_delta_group = ifelse(Simpson_delta < -0.425709, "Low",
"High"))
surv$Simpson_delta_group = factor(surv$Simpson_delta_group)

surv = surv %>% mutate(Simpson_delta_group2 = ifelse(Simpson_delta <
median(surv$Simpson_delta), "Low", "High"))
surv$Simpson_delta_group2 = factor(surv$Simpson_delta_group2)

surv$ELN2017 <- factor(surv$ELN2017)
surv$Male <- factor(surv$Male)

```



```

# Event Free Survival
# Fit survival curves
fit.RFS1 <- survfit(surv_object ~ 1, data = surv)

# Draw Relapse free survival for all patients
#svg(filename = 'surv_all.svg')#, width = 561, height = 531)
ggsurvplot(fit.RFS1, palette = "jco", conf.int = FALSE, main = "Event Free Survival (m)",
surv.median.line = "h")
#dev.off()
...

# Fit COXP model
``{r}
# Fit a Cox proportional hazards model

fit.coxph3 <- coxph(surv_object ~ Menhinick_Level + Simpson_delta_group2 + Age + Male +
ELN2017, data = surv)
ggforest(fit.coxph3, data = surv)

...

#####
# Step 4: RF Analysis for Reponse
#####

``{r}

# Remove RFS_Status and Relapse category from data frame

surv_RFS2 = surv[,!c(colnames(surv) == 'RFS_Status')]
surv_RFS2 <- surv_RFS2[,!c(colnames(surv_RFS2) == 'Relapse')][1:14] # also removing
categorical values

library(randomForest)
bag.aml = randomForest(RFS ~ ., surv_RFS2, type = 'regression', importance = T)
summary(bag.aml)
importance(bag.aml)
varImpPlot(bag.aml)

#Understand RF model
#ref:
https://cran.rstudio.com/web/packages/randomForestExplainer/vignettes/randomForestExplainer.html

library(randomForestExplainer)
min_depth_frame = min_depth_distribution(bag.aml)

plot_min_depth_distribution(min_depth_frame, mean_sample = 'all_trees', k = 15)

```

```

importance_frame = measure_importance(bag.aml)

# pdf('bag.features3.pdf', width = 6, height =4)
plot_multi_way_importance(importance_frame, x_measure = "mse_increase", y_measure =
"node_purity_increase", size_measure = "p_value", no_of_labels = 5)
# dev.off()

...

#####
# Step 5: RF Analysis for Response
#####

``{r}
surv2 = surv %>% mutate(Simpson_delta_group2 = ifelse(Simpson_delta <
median(surv$Simpson_delta), "Low", "High"))
surv2$Simpson_delta_group = factor(surv2$Simpson_delta_group)
surv2$Simpson_delta_group2 = factor(surv2$Simpson_delta_group2)

# Draw RFS
surv_object = Surv(time = surv2$RFS, event = surv2$RFS_Status)
fit.RFS2 <- survfit(surv_object ~ Simpson_delta_group, data = surv2)
fit.RFS2 <- survfit(surv_object ~ Simpson_delta_group2, data = surv2)
#svg(filename = 'surv_simpcutoff.svg')#, width = 561, height = 531)
ggsurvplot(fit.RFS2, palette = "jco", conf.int = FALSE, title = "Relapse Free Survival",
surv.median.line = "h", xlab = 'Time (d)', ylab = 'RFS', pval = T)
#dev.off()
...

```
